# Supplementary material for: The PMIP4 contribution to CMIP6 – Part 4: Scientific objectives and experimental design of the PMIP4-CMIP6 Last Glacial Maximum experiments and PMIP4 sensitivity experiments
Source: Copernicus journal article supplement (doi:10.5194/gmd-10-4035-2017), 2017-11-07
Supplement: Supplementary file 1 [file gmd-10-4035-2017-supplement.zip]

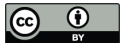

## *Supplement of*

# **The PMIP4 contribution to CMIP6 – Part 4: Scientific objectives and experimental design of the PMIP4-CMIP6 Last Glacial Maximum experiments and PMIP4 sensitivity experiments**

**Masa Kageyama et al.**

*Correspondence to:* Masa Kageyama (masa.kageyama@lsce.ipsl.fr)

- [gmd-10-4035-2017-supplement-title-page.pdf](#)
- [FigureS1.pdf](#)
- [pmip4-CMIP6-data-request-cmvmm\\_PMIP\\_PMIP\\_1\\_3.xlsx](#)

The copyright of individual parts of the supplement might differ from the CC BY 3.0 License.
