# Supplementary material for: The PMIP4 contribution to CMIP6 – Part 4: Scientific objectives and experimental design of the PMIP4-CMIP6 Last Glacial Maximum experiments and PMIP4 sensitivity experiments
Source: Copernicus journal article supplement (doi:10.5194/gmd-10-4035-2017), 2017-11-07
Supplement: Supplementary file 2 [file gmd-10-4035-2017-supplement.zip]

Archive with 3 entries (3 files):
- pmip4-CMIP6-data-request-cmvmm_PMIP_PMIP_1_3.xlsx
- FigureS1.pdf
- gmd-10-4035-2017-supplement-title-page.pdf
