# Supplementary material for: The PMIP4 contribution to CMIP6 – Part 4: Scientific objectives and experimental design of the PMIP4-CMIP6 Last Glacial Maximum experiments and PMIP4 sensitivity experiments
Source: Copernicus journal article supplement (doi:10.5194/gmd-10-4035-2017), 2017-11-07
Supplement: Supplementary file 2 [file gmd-10-4035-2017-supplement.zip › pmip4-CMIP6-data-request-cmvmm_PMIP_PMIP_1_3.xlsx]

## Sheet: Notes
	Notes on tables
Request Version	01.00.13
MIPs (...)	The last two columns in each row list MIPs associated with each variable. The first column in this pair lists the MIPs which are requesting the variable in one or more experiments. The second column lists the MIPs proposing experiments in which this variable is requested. E.g. If a variable is requested in a DECK experiment by HighResMIP, then HighResMIP appears in the first column and DECK in th…
Table	Reference Volume (1 deg. atmosphere, 0.5 deg. ocean)
6hrLev	3.8T
6hrPlev	75G
AERday	4G
AERmon	485G
Amon	718G
CFday	7G
CFmon	216G
Eday	42G
Efx	1M
Emon	1.1T
EmonZ	0M
LImon	18G
Lmon	114G
Ofx	243M
Omon	184G
Oyr	314G
SImon	48G
day	638G
fx	11M
TOTAL	7.8T

## Sheet: 6hrLev
Priority	Long name	units	description	comment	Variable Name	CF Standard Name	cell_methods	positive	type	dimensions	CMOR Name	modeling_realm	frequency	cell_measures	prov	provNote	rowIndex	UID	vid	stid	Structure Title	valid_min	valid_max	ok_min_mean_abs	ok_max_mean_abs	MIPs (requesting)	MIPs (by experiment)
1	Air Temperature	K	Air Temperature		ta	air_temperature	area: mean time: point		real	longitude latitude alevel time1	ta	atmos	6hr	area: areacella	6hrLev ((isd.003))		14	bab8f686-e5dd-11e5-8482-ac72891c3257	b9c3eb96337c69c1c4a5aab1317f5563	f7dcede6-562c-11e6-a2a4-ac72891c3257	Instantaneous value (i.e. synoptic or time-step value), Global field on model atmosphere levels [XY-A] [amn-tpt]					CMIP,CORDEX,PMIP,VIACSAB,VolMIP	CMIP,PMIP,ScenarioMIP,VolMIP
1	Eastward Wind	m s-1			ua	eastward_wind	time: point		real	longitude latitude alevel time1	ua	atmos	6hr	--OPT	6hrLev ((isd.003))		15	babb47a6-e5dd-11e5-8482-ac72891c3257	21db90c0a12448299f855fdab60930d4	f94870ca-80ba-11e6-ab6e-5404a60d96b5	Instantaneous value (i.e. synoptic or time-step value), Global field on model atmosphere levels [XY-A] [tpt]					CMIP,CORDEX,PMIP,VIACSAB,VolMIP	CMIP,PMIP,ScenarioMIP,VolMIP
1	Northward Wind	m s-1			va	northward_wind	time: point		real	longitude latitude alevel time1	va	atmos	6hr	--OPT	6hrLev ((isd.003))		16	babbaebc-e5dd-11e5-8482-ac72891c3257	2dedcb347c18e132a2f4d625abf94585	f94870ca-80ba-11e6-ab6e-5404a60d96b5	Instantaneous value (i.e. synoptic or time-step value), Global field on model atmosphere levels [XY-A] [tpt]					CMIP,CORDEX,PMIP,VIACSAB,VolMIP	CMIP,PMIP,ScenarioMIP,VolMIP
1	Specific Humidity	1.0			hus	specific_humidity	area: mean time: point		real	longitude latitude alevel time1	hus	atmos	6hr	area: areacella	6hrLev ((isd.003))		17	bab009cc-e5dd-11e5-8482-ac72891c3257	53f4724d228998d54191c73352532ce3	f7dcede6-562c-11e6-a2a4-ac72891c3257	Instantaneous value (i.e. synoptic or time-step value), Global field on model atmosphere levels [XY-A] [amn-tpt]					CMIP,CORDEX,PMIP,VIACSAB,VolMIP	CMIP,PMIP,ScenarioMIP,VolMIP
1	Surface Air Pressure	Pa	surface pressure (not mean sea-level pressure), 2-D field to calculate the 3-D pressure field from hybrid coordinates	surface pressure, not mean sea level pressure	ps	surface_air_pressure	area: mean time: point		real	longitude latitude time1	ps	atmos	6hr	area: areacella	6hrLev ((isd.003))		18	bab46b70-e5dd-11e5-8482-ac72891c3257	8c9504d28596e05586c8e193082ac617	63c0cae8-15f2-11e7-87e0-5404a60d96b5	Instantaneous value (i.e. synoptic or time-step value), Global field (single level) [XY-na] [amn-tpt]					CMIP,CORDEX,PMIP,VIACSAB,VolMIP	CMIP,PMIP,ScenarioMIP,VolMIP
1	Pressure on Model Levels	Pa	Air pressure on model levels	Air Pressure (required only if pressure on model levels cannot be derived from other fields, e.g. for a non-hydrostatic model)	pfull	air_pressure	area: time: mean			longitude latitude alevel time	pfull	atmos	6hr	area: areacella	PMIP [PMIP-6hr]		8	d237b082-4a9f-11e6-b84e-ac72891c3257	7a107875bd58c5e655e8f87152a3bad7	62eebe98-1617-11e7-a126-5404a60d96b5	Temporal mean, Global field on model atmosphere levels [XY-A]					PMIP	CMIP,PMIP

## Sheet: 6hrPlev
Priority	Long name	units	description	comment	Variable Name	CF Standard Name	cell_methods	positive	type	dimensions	CMOR Name	modeling_realm	frequency	cell_measures	prov	provNote	rowIndex	UID	vid	stid	Structure Title	valid_min	valid_max	ok_min_mean_abs	ok_max_mean_abs	MIPs (requesting)	MIPs (by experiment)
1	Eastward Wind at 200hPa	m s-1	Zonal wind (positive eastwards) at 200hPa		ua200	eastward_wind	area: time: mean			longitude latitude time p200	ua200	atmos	6hr	area: areacella	PMIP [PMIP-6hr]		4	d237a092-4a9f-11e6-b84e-ac72891c3257	df11ad28e457894085d760bdfb1cfc96	f7ed42fe-562c-11e6-a2a4-ac72891c3257	Temporal mean, Global field (single level) [XY-na] {:p200}					PMIP	CMIP,PMIP
1	Eastward Wind at 850 hPa	m s-1	Zonal wind on the 850 hPa surface		ua850	eastward_wind	area: time: mean			longitude latitude time p850	ua850	atmos	6hr	area: areacella	PMIP [PMIP-6hr]		5	d237a484-4a9f-11e6-b84e-ac72891c3257	74664cc3f23008726cc939f53e57325a	f7ea7254-562c-11e6-a2a4-ac72891c3257	Temporal mean, Global field (single level) [XY-na] {:p850} [tmean]					PMIP	CMIP,PMIP
1	Northward Wind	m s-1	Northward component of the wind		va200	northward_wind	area: time: mean			longitude latitude time p200	va200	atmos	6hr	area: areacella	PMIP [PMIP-6hr]		6	d237a84e-4a9f-11e6-b84e-ac72891c3257	31da97523029203798a150a71bc20301	f7ed42fe-562c-11e6-a2a4-ac72891c3257	Temporal mean, Global field (single level) [XY-na] {:p200}					PMIP	CMIP,PMIP
1	Northward Wind	m s-1	Northward component of the wind at 850hPa		va850	northward_wind	area: time: mean			longitude latitude time p850	va850	atmos	6hr	area: areacella	PMIP [PMIP-6hr]		7	d237ac9a-4a9f-11e6-b84e-ac72891c3257	4845c81a8e19c6dd7059fa1a115c17ab	f7ea7254-562c-11e6-a2a4-ac72891c3257	Temporal mean, Global field (single level) [XY-na] {:p850} [tmean]					PMIP	CMIP,PMIP

## Sheet: AERday
Priority	Long name	units	description	comment	Variable Name	CF Standard Name	cell_methods	positive	type	dimensions	CMOR Name	modeling_realm	frequency	cell_measures	prov	provNote	rowIndex	UID	vid	stid	Structure Title	valid_min	valid_max	ok_min_mean_abs	ok_max_mean_abs	MIPs (requesting)	MIPs (by experiment)
1	Geopotential Height at 500 hPa	m	geopotential height on the 500 hPa surface	geopotential height on the 500 hPa surface	zg500	geopotential_height	area: time: mean		float	longitude latitude time p500	zg500	aerosol	day	area: areacella	AERday ((isd.003))	AERday	-1	0fabb742-817d-11e6-b80b-5404a60d96b5	c0007a5e2b555d399d9bfe49f7502f1b	f7e53744-562c-11e6-a2a4-ac72891c3257	Temporal mean, Global field (single level) [XY-na] {:p500} [tmean]					AerChemMIP,DCPP,PMIP	C4MIP,CMIP,DCPP,PMIP,ScenarioMIP

## Sheet: AERmon
Priority	Long name	units	description	comment	Variable Name	CF Standard Name	cell_methods	positive	type	dimensions	CMOR Name	modeling_realm	frequency	cell_measures	prov	provNote	rowIndex	UID	vid	stid	Structure Title	valid_min	valid_max	ok_min_mean_abs	ok_max_mean_abs	MIPs (requesting)	MIPs (by experiment)
1	Ambient Aerosol Absorption Optical Thickness at 550 nm	1.0			abs550aer	atmosphere_absorption_optical_thickness_due_to_ambient_aerosol	area: time: mean		float	longitude latitude time	abs550aer	aerosol	mon	area: areacella	AERmon ((isd.003))	AERmon-oth	-1	19bebf2a-81b1-11e6-92de-ac72891c3257	0baf6a333b91c4db341b515c28cd2c05	f7dcac96-562c-11e6-a2a4-ac72891c3257	Temporal mean, Global field (single level) [XY-na] [am-tm]					AerChemMIP,CFMIP,DAMIP,GeoMIP,HighResMIP,PMIP,RFMIP	C4MIP,CFMIP,CMIP,DAMIP,GeoMIP,HighResMIP,PMIP,RFMIP,ScenarioMIP
1	Dry Deposition Rate of Dust	kg m-2 s-1	Dry deposition includes gravitational settling, impact scavenging, and turbulent deposition.	Dry deposition includes gravitational settling, impact scavenging, and turbulent deposition.	drydust	tendency_of_atmosphere_mass_content_of_dust_dry_aerosol_particles_due_to_dry_deposition	area: time: mean		float	longitude latitude time	drydust	aerosol	mon	area: areacella	AERmon ((isd.003))	AERmon-oth	-1	19c064c4-81b1-11e6-92de-ac72891c3257	6444d8c6e394c5d66ae3f732f0ede043	f7dcac96-562c-11e6-a2a4-ac72891c3257	Temporal mean, Global field (single level) [XY-na] [am-tm]					AerChemMIP,DAMIP,GeoMIP,HighResMIP,PMIP	C4MIP,CMIP,DAMIP,GeoMIP,HighResMIP,PMIP,ScenarioMIP
1	total emission rate of dust	kg m-2 s-1	Integrate 3D emission field vertically to 2d field.		emidust	tendency_of_atmosphere_mass_content_of_dust_dry_aerosol_particles_due_to_emission	area: time: mean		float	longitude latitude time	emidust	aerosol	mon	area: areacella	AERmon ((isd.003))	AERmon-oth	-1	19be5db4-81b1-11e6-92de-ac72891c3257	96d843d6b5a59d1e53e07df9641def86	f7dcac96-562c-11e6-a2a4-ac72891c3257	Temporal mean, Global field (single level) [XY-na] [am-tm]					AerChemMIP,DAMIP,GeoMIP,HighResMIP,PMIP	C4MIP,CMIP,DAMIP,GeoMIP,HighResMIP,PMIP,ScenarioMIP
1	liquid water path	kg m-2			lwp	atmosphere_mass_content_of_cloud_liquid_water	area: time: mean		float	longitude latitude time	lwp	aerosol	mon	area: areacella	AERmon ((isd.003))	AERmon-oth	-1	19bf71ae-81b1-11e6-92de-ac72891c3257	e6b31a1928879fcd3c92fe7b592f070e	f7dcac96-562c-11e6-a2a4-ac72891c3257	Temporal mean, Global field (single level) [XY-na] [am-tm]					AerChemMIP,DAMIP,HighResMIP,PMIP	C4MIP,CMIP,DAMIP,HighResMIP,PMIP,ScenarioMIP
1	Dust aerosol mass mixing ratio	kg kg-1			mmrdust	mass_fraction_of_dust_dry_aerosol_particles_in_air	area: time: mean		float	longitude latitude alevel time	mmrdust	aerosol	mon	area: areacella	AERmon ((isd.003))	AERmon-3d	-1	19bed91a-81b1-11e6-92de-ac72891c3257	dcecb293537e640a0bfc8f88a92967fe	62eebe98-1617-11e7-a126-5404a60d96b5	Temporal mean, Global field on model atmosphere levels [XY-A]					AerChemMIP,CFMIP,DAMIP,GeoMIP,PMIP,RFMIP	C4MIP,CFMIP,CMIP,DAMIP,GeoMIP,PMIP,RFMIP,ScenarioMIP
1	Sea Salt mass mixing ratio	kg kg-1			mmrss	mass_fraction_of_seasalt_dry_aerosol_particles_in_air	area: time: mean		float	longitude latitude alevel time	mmrss	aerosol	mon	area: areacella	AERmon ((isd.003))	AERmon-3d	-1	19bed1f4-81b1-11e6-92de-ac72891c3257	5980f8e283fd4709e4542c0652756dc1	62eebe98-1617-11e7-a126-5404a60d96b5	Temporal mean, Global field on model atmosphere levels [XY-A]					AerChemMIP,CFMIP,DAMIP,GeoMIP,PMIP,RFMIP	C4MIP,CFMIP,CMIP,DAMIP,GeoMIP,PMIP,RFMIP,ScenarioMIP
1	ambient aerosol optical thickness at 550 nm	1.0	AOD from the ambient aerosols (i.e., includes aerosol water). Does not include AOD from stratospheric aerosols if these are prescribed but includes other possible background aerosol types. Needs a comment attribute "wavelength: 550 nm"	AOD from ambient aerosols (i.e., includes aerosol water). Does not include AOD from stratospheric aerosols if these are prescribed but includes other possible background aerosol types. Needs a comment attribute "wavelength: 550 nm"	od550aer	atmosphere_optical_thickness_due_to_ambient_aerosol_particles	area: time: mean		float	longitude latitude time	od550aer	aerosol	mon	area: areacella	AERmon ((isd.003))	AERmon-oth	-1	19c01942-81b1-11e6-92de-ac72891c3257	8f2fb9e812c26ee6cb8d9673e09d2644	f7dcac96-562c-11e6-a2a4-ac72891c3257	Temporal mean, Global field (single level) [XY-na] [am-tm]					AerChemMIP,CFMIP,DAMIP,GeoMIP,HighResMIP,PMIP,RFMIP	C4MIP,CFMIP,CMIP,DAMIP,GeoMIP,HighResMIP,PMIP,RFMIP,ScenarioMIP
1	dust aod@550nm	1.0			od550dust	atmosphere_optical_thickness_due_to_dust_ambient_aerosol	area: time: mean		float	longitude latitude time	od550dust	aerosol	mon	area: areacella	AERmon ((isd.003))	AERmon-oth	-1	19bf97d8-81b1-11e6-92de-ac72891c3257	6bc406259290f4e4beaaaf960455d779	f7dcac96-562c-11e6-a2a4-ac72891c3257	Temporal mean, Global field (single level) [XY-na] [am-tm]					AerChemMIP,DAMIP,HighResMIP,PMIP,RFMIP	C4MIP,CMIP,DAMIP,HighResMIP,PMIP,RFMIP,ScenarioMIP
1	sulfate aod@550nm	1.0	proposed name: atmosphere_optical_thickness_due_to_sulfate_ambient_aerosol		od550so4	atmosphere_optical_thickness_due_to_sulfate_ambient_aerosol	area: time: mean		float	longitude latitude time	od550so4	aerosol	mon	area: areacella	AERmon ((isd.003))	AERmon-oth	-1	19bf19ca-81b1-11e6-92de-ac72891c3257	b9ca453bfa3c606401892e5768ca7d6c	f7dcac96-562c-11e6-a2a4-ac72891c3257	Temporal mean, Global field (single level) [XY-na] [am-tm]					AerChemMIP,DAMIP,HighResMIP,PMIP,RFMIP	C4MIP,CMIP,DAMIP,HighResMIP,PMIP,RFMIP,ScenarioMIP
1	Pressure on Model Levels	Pa	Air pressure on model levels	The atmospheric pressure at the model layer midpoints for all times and levels in the associated output variables	pfull	air_pressure	area: time: mean		float	longitude latitude alevel time	pfull	aerosol	mon	area: areacella	AERmon ((isd.003))	AERmon-3d	-1	01d46078-c792-11e6-aa58-5404a60d96b5	7a107875bd58c5e655e8f87152a3bad7	62eebe98-1617-11e7-a126-5404a60d96b5	Temporal mean, Global field on model atmosphere levels [XY-A]					AerChemMIP,DAMIP,PMIP	C4MIP,CMIP,DAMIP,PMIP,ScenarioMIP
1	Pressure on Model Half-Levels	Pa	Air pressure on model half-levels	The atmospheric pressure at the model layer interfaces for all times and levels in the associated output variables	phalf	air_pressure	area: time: mean		float	longitude latitude alevel time	phalf	aerosol	mon	area: areacella	AERmon ((isd.003))	AERmon-3d	-1	01d4d80a-c792-11e6-aa58-5404a60d96b5	154ab10964742eaff37de9cc5beef39c	62eebe98-1617-11e7-a126-5404a60d96b5	Temporal mean, Global field on model atmosphere levels [XY-A]					AerChemMIP,DAMIP,PMIP	C4MIP,CMIP,DAMIP,PMIP,ScenarioMIP
1	tendency_of_air_temperature_due_to_longwave_heating	K s-1	Tendency of air temperature due to longwave radiative heating	longwave heating rates	tntrl	tendency_of_air_temperature_due_to_longwave_heating	area: time: mean		float	longitude latitude alevel time	tntrl	aerosol	mon	area: areacella	AERmon ((isd.003))	AERmon-3d	-1	01d409fc-c792-11e6-aa58-5404a60d96b5	5917483c-9e49-11e5-803c-0d0b866b59f3	62eebe98-1617-11e7-a126-5404a60d96b5	Temporal mean, Global field on model atmosphere levels [XY-A]					AerChemMIP,CFMIP,DAMIP,PMIP	C4MIP,CFMIP,CMIP,DAMIP,PMIP,ScenarioMIP
1	wet deposition rate of dust	kg m-2 s-1			wetdust	tendency_of_atmosphere_mass_content_of_dust_dry_aerosol_particles_due_to_wet_deposition	area: time: mean		float	longitude latitude time	wetdust	aerosol	mon	area: areacella	AERmon ((isd.003))	AERmon-oth	-1	19be7024-81b1-11e6-92de-ac72891c3257	0f914086f4c1cd76f867eef7cd71154d	f7dcac96-562c-11e6-a2a4-ac72891c3257	Temporal mean, Global field (single level) [XY-na] [am-tm]					AerChemMIP,DAMIP,GeoMIP,HighResMIP,PMIP	C4MIP,CMIP,DAMIP,GeoMIP,HighResMIP,PMIP,ScenarioMIP

## Sheet: Amon
Priority	Long name	units	description	comment	Variable Name	CF Standard Name	cell_methods	positive	type	dimensions	CMOR Name	modeling_realm	frequency	cell_measures	prov	provNote	rowIndex	UID	vid	stid	Structure Title	valid_min	valid_max	ok_min_mean_abs	ok_max_mean_abs	MIPs (requesting)	MIPs (by experiment)
1	Near-Surface Air Temperature	K	near-surface (usually, 2 meter) air temperature		tas	air_temperature	area: time: mean		real	longitude latitude time height2m	tas	atmos	mon	area: areacella	Amon ((isd.003))	Amon_2d	14	bab9237c-e5dd-11e5-8482-ac72891c3257	5c4978e802ba55d5a298cf1b3bdc2b3a	f7e1ef26-562c-11e6-a2a4-ac72891c3257	Temporal mean, Global field (single level) [XY-na] {:height2m} [tmean]	170.0 r	350.0 r	255.0 r	295.0 r	AerChemMIP,C4MIP,CFMIP,CMIP,DAMIP,DCPP,DynVar,FAFMIP,GMMIP,GeoMIP,HighResMIP,ISMIP6,LS3MIP,LUMIP,PMIP,RFMIP,VIACSAB,VolMIP	C4MIP,CFMIP,CMIP,DAMIP,DCPP,FAFMIP,GMMIP,GeoMIP,HighResMIP,ISMIP6,LS3MIP,LUMIP,PMIP,RFMIP,ScenarioMIP,VolMIP
1	Surface Temperature	K	Temperature of the lower boundary of the atmosphere	"skin" temperature (i.e., SST for open ocean)	ts	surface_temperature	area: time: mean		real	longitude latitude time	ts	atmos	mon	area: areacella	Amon ((isd.003))	Amon_2d	15	babaef0e-e5dd-11e5-8482-ac72891c3257	90c49fce92dc1f21647dad07d1342843	f7dcac96-562c-11e6-a2a4-ac72891c3257	Temporal mean, Global field (single level) [XY-na] [am-tm]	170.0 r	340.0 r	255.0 r	295.0 r	AerChemMIP,C4MIP,CFMIP,CMIP,DAMIP,DCPP,FAFMIP,GMMIP,GeoMIP,HighResMIP,ISMIP6,LS3MIP,LUMIP,PMIP,RFMIP,VIACSAB,VolMIP	C4MIP,CFMIP,CMIP,DAMIP,DCPP,FAFMIP,GMMIP,GeoMIP,HighResMIP,ISMIP6,LS3MIP,LUMIP,PMIP,RFMIP,ScenarioMIP,VolMIP
1	Daily Minimum Near-Surface Air Temperature	K	minimum near-surface (usually, 2 meter) air temperature (add cell_method attribute "time: min")	monthly mean of the daily-minimum near-surface air temperature.	tasmin	air_temperature	area: mean time: minimum within days time: mean over days		real	longitude latitude time height2m	tasmin	atmos	mon	area: areacella	Amon ((isd.003))	Amon_2d	16	bab955ea-e5dd-11e5-8482-ac72891c3257	cce3dd39c138bf3c4d713263cc2e6cff	f7e03122-562c-11e6-a2a4-ac72891c3257	Temporal mean, Global field (single level) [XY-na] {:height2m} [dmin]	165.0 r	345.0 r	250.0 r	290.0 r	AerChemMIP,C4MIP,CFMIP,CMIP,DAMIP,DCPP,FAFMIP,GMMIP,GeoMIP,HighResMIP,ISMIP6,LS3MIP,LUMIP,PMIP,RFMIP,VIACSAB,VolMIP	C4MIP,CFMIP,CMIP,DAMIP,DCPP,FAFMIP,GMMIP,GeoMIP,HighResMIP,ISMIP6,LS3MIP,LUMIP,PMIP,RFMIP,ScenarioMIP,VolMIP
1	Daily Maximum Near-Surface Air Temperature	K	maximum near-surface (usually, 2 meter) air temperature (add cell_method attribute "time: max")	monthly mean of the daily-maximum near-surface air temperature.	tasmax	air_temperature	area: mean time: maximum within days time: mean over days		real	longitude latitude time height2m	tasmax	atmos	mon	area: areacella	Amon ((isd.003))	Amon_2d	17	bab942a8-e5dd-11e5-8482-ac72891c3257	2dd48e8c50b4b88a83ff07d308e4e642	f7e04194-562c-11e6-a2a4-ac72891c3257	Temporal mean, Global field (single level) [XY-na] {:height2m} [dmax]	175.0 r	355.0 r	260.0 r	300.0 r	AerChemMIP,C4MIP,CFMIP,CMIP,DAMIP,DCPP,FAFMIP,GMMIP,GeoMIP,HighResMIP,ISMIP6,LS3MIP,LUMIP,PMIP,RFMIP,VIACSAB,VolMIP	C4MIP,CFMIP,CMIP,DAMIP,DCPP,FAFMIP,GMMIP,GeoMIP,HighResMIP,ISMIP6,LS3MIP,LUMIP,PMIP,RFMIP,ScenarioMIP,VolMIP
1	Sea Level Pressure	Pa	Sea Level Pressure	not, in general, the same as surface pressure	psl	air_pressure_at_sea_level	area: time: mean		real	longitude latitude time	psl	atmos	mon	area: areacella	Amon ((isd.003))	Amon_2d	18	bab48ce0-e5dd-11e5-8482-ac72891c3257	3d23c359f44d6a153c4dcab9e07d7cb6	f7dcac96-562c-11e6-a2a4-ac72891c3257	Temporal mean, Global field (single level) [XY-na] [am-tm]	91000.0 r	109000.0 r	96000.0 r	106000.0 r	AerChemMIP,C4MIP,CFMIP,CMIP,DAMIP,DCPP,DynVar,FAFMIP,GMMIP,GeoMIP,HighResMIP,LS3MIP,LUMIP,PMIP,RFMIP,VIACSAB,VolMIP	C4MIP,CFMIP,CMIP,DAMIP,DCPP,FAFMIP,GMMIP,GeoMIP,HighResMIP,LS3MIP,LUMIP,PMIP,RFMIP,ScenarioMIP,VolMIP
1	Surface Air Pressure	Pa	surface pressure (not mean sea-level pressure), 2-D field to calculate the 3-D pressure field from hybrid coordinates	not, in general, the same as mean sea-level pressure	ps	surface_air_pressure	area: time: mean		real	longitude latitude time	ps	atmos	mon	area: areacella	Amon ((isd.003))	Amon_2d	19	bab47b56-e5dd-11e5-8482-ac72891c3257	8c9504d28596e05586c8e193082ac617	f7dcac96-562c-11e6-a2a4-ac72891c3257	Temporal mean, Global field (single level) [XY-na] [am-tm]	47500.0 r	112000.0 r	93000.0 r	100000.0 r	AerChemMIP,C4MIP,CFMIP,CMIP,DAMIP,DCPP,FAFMIP,GMMIP,GeoMIP,HighResMIP,LS3MIP,LUMIP,PMIP,RFMIP,VIACSAB,VolMIP	C4MIP,CFMIP,CMIP,DAMIP,DCPP,FAFMIP,GMMIP,GeoMIP,HighResMIP,LS3MIP,LUMIP,PMIP,RFMIP,ScenarioMIP,VolMIP
1	Eastward Near-Surface Wind	m s-1	Eastward component of the near-surface (usually, 10 meters) wind		uas	eastward_wind	area: time: mean		real	longitude latitude time height10m	uas	atmos	mon	area: areacella	Amon ((isd.003))	Amon_2d	20	babb67c2-e5dd-11e5-8482-ac72891c3257	e72b243a2a1c8691ab0168d8b62534c2	af250420-1e00-11e7-a625-5404a60d96b5	Temporal mean, Global field (single level) [XY-na] {:height10m} [tmean]	-80.0 r	80.0 r	1.0 r	10.0 r	AerChemMIP,C4MIP,CFMIP,CMIP,DAMIP,DCPP,DynVar,FAFMIP,GMMIP,GeoMIP,HighResMIP,ISMIP6,LS3MIP,LUMIP,PMIP,RFMIP,VIACSAB,VolMIP	C4MIP,CFMIP,CMIP,DAMIP,DCPP,FAFMIP,GMMIP,GeoMIP,HighResMIP,ISMIP6,LS3MIP,LUMIP,PMIP,RFMIP,ScenarioMIP,VolMIP
1	Northward Near-Surface Wind	m s-1	Northward component of the near surface wind		vas	northward_wind	area: time: mean		real	longitude latitude time height10m	vas	atmos	mon	area: areacella	Amon ((isd.003))	Amon_2d	21	babbcd34-e5dd-11e5-8482-ac72891c3257	86b1cd51f370e346ecb20f1e80cb6ea4	af250420-1e00-11e7-a625-5404a60d96b5	Temporal mean, Global field (single level) [XY-na] {:height10m} [tmean]	-80.0 r	80.0 r	1.0 r	10.0 r	AerChemMIP,C4MIP,CFMIP,CMIP,DAMIP,DCPP,DynVar,FAFMIP,GMMIP,GeoMIP,HighResMIP,ISMIP6,LS3MIP,LUMIP,PMIP,RFMIP,VIACSAB,VolMIP	C4MIP,CFMIP,CMIP,DAMIP,DCPP,FAFMIP,GMMIP,GeoMIP,HighResMIP,ISMIP6,LS3MIP,LUMIP,PMIP,RFMIP,ScenarioMIP,VolMIP
1	Near-Surface Wind Speed	m s-1	near-surface (usually, 10 meters) wind speed.	This is the mean of the speed, not the speed computed from the mean u and v components of wind	sfcWind	wind_speed	area: time: mean		real	longitude latitude time height10m	sfcWind	atmos	mon	area: areacella	Amon ((isd.003))	Amon_2d	22	bab6f494-e5dd-11e5-8482-ac72891c3257	4b97609a32d53dff5b8e73729e4f258b	af250420-1e00-11e7-a625-5404a60d96b5	Temporal mean, Global field (single level) [XY-na] {:height10m} [tmean]	0.0 r	80.0 r	1.0 r	15.0 r	AerChemMIP,C4MIP,CFMIP,CMIP,DAMIP,DCPP,FAFMIP,GMMIP,GeoMIP,HighResMIP,ISMIP6,LS3MIP,LUMIP,PMIP,RFMIP,VIACSAB,VolMIP	C4MIP,CFMIP,CMIP,DAMIP,DCPP,FAFMIP,GMMIP,GeoMIP,HighResMIP,ISMIP6,LS3MIP,LUMIP,PMIP,RFMIP,ScenarioMIP,VolMIP
1	Near-Surface Relative Humidity	%	The relative humidity with respect to liquid water for T> 0 C, and with respect to ice for T<0 C.	This is the relative humidity with respect to liquid water for T> 0 C, and with respect to ice for T<0 C.	hurs	relative_humidity	area: time: mean		real	longitude latitude time height2m	hurs	atmos	mon	area: areacella	Amon ((isd.003))	Amon_2d	23	baaff41e-e5dd-11e5-8482-ac72891c3257	c75f684ec69602e9de82b48e53afb2cc	f7e1ef26-562c-11e6-a2a4-ac72891c3257	Temporal mean, Global field (single level) [XY-na] {:height2m} [tmean]	-0.001 r	100.001 r	50.0 s	99.0 s	AerChemMIP,C4MIP,CFMIP,CMIP,DAMIP,FAFMIP,GMMIP,GeoMIP,HighResMIP,ISMIP6,LS3MIP,LUMIP,PMIP,RFMIP,VIACSAB,VolMIP	C4MIP,CFMIP,CMIP,DAMIP,DCPP,FAFMIP,GMMIP,GeoMIP,HighResMIP,ISMIP6,LS3MIP,LUMIP,PMIP,RFMIP,ScenarioMIP,VolMIP
1	Near-Surface Specific Humidity	1.0	Near-surface (usually, 2 meter) specific humidity.		huss	specific_humidity	area: time: mean		real	longitude latitude time height2m	huss	atmos	mon	area: areacella	Amon ((isd.003))	Amon_2d	24	bab01dfe-e5dd-11e5-8482-ac72891c3257	ebfefc2ab8716ef597b128171b275945	f7e1ef26-562c-11e6-a2a4-ac72891c3257	Temporal mean, Global field (single level) [XY-na] {:height2m} [tmean]	0.0 r	0.03 r	0.005 r	0.012 r	AerChemMIP,C4MIP,CFMIP,CMIP,DAMIP,DCPP,FAFMIP,GMMIP,GeoMIP,HighResMIP,ISMIP6,LS3MIP,LUMIP,PMIP,RFMIP,VIACSAB,VolMIP	C4MIP,CFMIP,CMIP,DAMIP,DCPP,FAFMIP,GMMIP,GeoMIP,HighResMIP,ISMIP6,LS3MIP,LUMIP,PMIP,RFMIP,ScenarioMIP,VolMIP
1	Precipitation	kg m-2 s-1	includes both liquid and solid phases	at surface; includes both liquid and solid phases from all types of clouds (both large-scale and convective)	pr	precipitation_flux	area: time: mean		real	longitude latitude time	pr	atmos	mon	area: areacella	Amon ((isd.003))	Amon_2d	25	bab3cb52-e5dd-11e5-8482-ac72891c3257	62f26742cf240c1b5169a5cd511196b6	f7dcac96-562c-11e6-a2a4-ac72891c3257	Temporal mean, Global field (single level) [XY-na] [am-tm]	-1e-06 r	0.0015 r	1.5e-05 r	4e-05 r	AerChemMIP,C4MIP,CFMIP,CMIP,DAMIP,DCPP,DynVar,FAFMIP,GMMIP,GeoMIP,HighResMIP,ISMIP6,LS3MIP,LUMIP,PMIP,RFMIP,VIACSAB,VolMIP	C4MIP,CFMIP,CMIP,DAMIP,DCPP,FAFMIP,GMMIP,GeoMIP,HighResMIP,ISMIP6,LS3MIP,LUMIP,PMIP,RFMIP,ScenarioMIP,VolMIP
1	Snowfall Flux	kg m-2 s-1	at surface; includes precipitation of all forms of water in the solid phase	at surface; includes precipitation of all forms of water in the solid phase	prsn	snowfall_flux	area: time: mean		real	longitude latitude time	prsn	atmos	mon	area: areacella	Amon ((isd.003))	Amon_2d	26	bab42b88-e5dd-11e5-8482-ac72891c3257	051919eddec810e292c883205c944ceb	f7dcac96-562c-11e6-a2a4-ac72891c3257	Temporal mean, Global field (single level) [XY-na] [am-tm]	-1e-06 r	0.0008 r	1e-06 r	8e-06 r	AerChemMIP,C4MIP,CFMIP,CMIP,DAMIP,DCPP,FAFMIP,GMMIP,GeoMIP,HighResMIP,ISMIP6,LS3MIP,LUMIP,PMIP,RFMIP,VIACSAB,VolMIP	C4MIP,CFMIP,CMIP,DAMIP,DCPP,FAFMIP,GMMIP,GeoMIP,HighResMIP,ISMIP6,LS3MIP,LUMIP,PMIP,RFMIP,ScenarioMIP,VolMIP
1	Convective Precipitation	kg m-2 s-1	Convective precipitation at surface; includes both liquid and solid phases.	at surface; includes both liquid and solid phases.	prc	convective_precipitation_flux	area: time: mean		real	longitude latitude time	prc	atmos	mon	area: areacella	Amon ((isd.003))	Amon_2d	27	bab3f8a2-e5dd-11e5-8482-ac72891c3257	aa2bea81f238ad8f2c35a7e16ad97801	f7dcac96-562c-11e6-a2a4-ac72891c3257	Temporal mean, Global field (single level) [XY-na] [am-tm]	-1e-06 r	0.0015 r	3e-06 r	4e-05 r	AerChemMIP,C4MIP,CFMIP,CMIP,DAMIP,FAFMIP,GMMIP,GeoMIP,HighResMIP,ISMIP6,LS3MIP,LUMIP,PMIP,RFMIP,VIACSAB,VolMIP	C4MIP,CFMIP,CMIP,DAMIP,DCPP,FAFMIP,GMMIP,GeoMIP,HighResMIP,ISMIP6,LS3MIP,LUMIP,PMIP,RFMIP,ScenarioMIP,VolMIP
1	Evaporation	kg m-2 s-1	Evaporation at surface: flux of water into the atmosphere due to conversion of both liquid and solid phases to vapor (from underlying surface and vegetation)	at surface; flux of water into the atmosphere due to conversion of both liquid and solid phases to vapor (from underlying surface and vegetation)	evspsbl	water_evaporation_flux	area: time: mean		real	longitude latitude time	evspsbl	atmos	mon	area: areacella	Amon ((isd.003))	Amon_2d	28	baad45c0-e5dd-11e5-8482-ac72891c3257	089961a3af4d54d5fb045cf3750e760c	f7dcac96-562c-11e6-a2a4-ac72891c3257	Temporal mean, Global field (single level) [XY-na] [am-tm]					AerChemMIP,C4MIP,CFMIP,CMIP,DAMIP,DCPP,FAFMIP,GMMIP,GeoMIP,HighResMIP,ISMIP6,LS3MIP,LUMIP,PMIP,RFMIP,VIACSAB,VolMIP	C4MIP,CFMIP,CMIP,DAMIP,DCPP,FAFMIP,GMMIP,GeoMIP,HighResMIP,ISMIP6,LS3MIP,LUMIP,PMIP,RFMIP,ScenarioMIP,VolMIP
1	Surface Snow and Ice Sublimation Flux	kg m-2 s-1	The snow and ice sublimation flux is the loss of snow and ice mass per unit area from the surface resulting from their direct conversion to water vapor that enters the atmosphere.	The snow and ice sublimation flux is the loss of snow and ice mass from the surface resulting from their conversion to water vapor that enters the atmosphere.	sbl	surface_snow_and_ice_sublimation_flux	area: time: mean		real	longitude latitude time	sbl	landIce	mon	area: areacella	Amon ((isd.003))	Amon_2d	29	bab6b948-e5dd-11e5-8482-ac72891c3257	3a8e1636a31c82fbdd9a1ae45ab3be7d	f7dcac96-562c-11e6-a2a4-ac72891c3257	Temporal mean, Global field (single level) [XY-na] [am-tm]	-0.0005 r	0.001 r	0.0 r	0.0001 r	AerChemMIP,C4MIP,CFMIP,CMIP,DAMIP,FAFMIP,GMMIP,GeoMIP,HighResMIP,ISMIP6,LS3MIP,LUMIP,PMIP,RFMIP,VolMIP	C4MIP,CFMIP,CMIP,DAMIP,FAFMIP,GMMIP,GeoMIP,HighResMIP,ISMIP6,LS3MIP,LUMIP,PMIP,RFMIP,ScenarioMIP,VolMIP
1	Surface Downward Eastward Wind Stress	Pa	Downward eastward wind stress at the surface		tauu	surface_downward_eastward_stress	area: time: mean	down	real	longitude latitude time	tauu	atmos	mon	area: areacella	Amon ((isd.003))	Amon_2d	30	bab96cc4-e5dd-11e5-8482-ac72891c3257	3abb7c5b4c4650e9d17a8439004aebea	f7dcac96-562c-11e6-a2a4-ac72891c3257	Temporal mean, Global field (single level) [XY-na] [am-tm]	-10.0 r	10.0 r	0.01 r	0.2 r	AerChemMIP,C4MIP,CFMIP,CMIP,DAMIP,DCPP,FAFMIP,GMMIP,GeoMIP,HighResMIP,LS3MIP,LUMIP,PMIP,RFMIP,VIACSAB,VolMIP	C4MIP,CFMIP,CMIP,DAMIP,DCPP,FAFMIP,GMMIP,GeoMIP,HighResMIP,LS3MIP,LUMIP,PMIP,RFMIP,ScenarioMIP,VolMIP
1	Surface Downward Northward Wind Stress	Pa	Downward northward wind stress at the surface		tauv	surface_downward_northward_stress	area: time: mean	down	real	longitude latitude time	tauv	atmos	mon	area: areacella	Amon ((isd.003))	Amon_2d	31	bab9888a-e5dd-11e5-8482-ac72891c3257	bd10cebbde1593b65e5220911f9a997c	f7dcac96-562c-11e6-a2a4-ac72891c3257	Temporal mean, Global field (single level) [XY-na] [am-tm]	-10.0 r	10.0 r	0.01 r	0.2 r	AerChemMIP,C4MIP,CFMIP,CMIP,DAMIP,DCPP,FAFMIP,GMMIP,GeoMIP,HighResMIP,LS3MIP,LUMIP,PMIP,RFMIP,VIACSAB,VolMIP	C4MIP,CFMIP,CMIP,DAMIP,DCPP,FAFMIP,GMMIP,GeoMIP,HighResMIP,LS3MIP,LUMIP,PMIP,RFMIP,ScenarioMIP,VolMIP
1	Surface Upward Latent Heat Flux	W m-2		includes both evaporation and sublimation	hfls	surface_upward_latent_heat_flux	area: time: mean	up	real	longitude latitude time	hfls	atmos	mon	area: areacella	Amon ((isd.003))	Amon_2d	32	baaefe2e-e5dd-11e5-8482-ac72891c3257	95cbf6ac889c8fe7d92e20e8c34960d1	f7dcac96-562c-11e6-a2a4-ac72891c3257	Temporal mean, Global field (single level) [XY-na] [am-tm]	-400.0 r	1800.0 r	30.0 r	110.0 r	AerChemMIP,C4MIP,CFMIP,CMIP,DAMIP,DCPP,FAFMIP,GMMIP,GeoMIP,HighResMIP,ISMIP6,LS3MIP,LUMIP,PMIP,RFMIP,VIACSAB,VolMIP	C4MIP,CFMIP,CMIP,DAMIP,DCPP,FAFMIP,GMMIP,GeoMIP,HighResMIP,ISMIP6,LS3MIP,LUMIP,PMIP,RFMIP,ScenarioMIP,VolMIP
1	Surface Upward Sensible Heat Flux	W m-2			hfss	surface_upward_sensible_heat_flux	area: time: mean	up	real	longitude latitude time	hfss	atmos	mon	area: areacella	Amon ((isd.003))	Amon_2d	33	baaf86a0-e5dd-11e5-8482-ac72891c3257	a13ed886b17e20cdae8b89b9ff8e4610	f7dcac96-562c-11e6-a2a4-ac72891c3257	Temporal mean, Global field (single level) [XY-na] [am-tm]	-1000.0 r	2000.0 r	5.0 r	60.0 r	AerChemMIP,C4MIP,CFMIP,CMIP,DAMIP,DCPP,FAFMIP,GMMIP,GeoMIP,HighResMIP,ISMIP6,LS3MIP,LUMIP,PMIP,RFMIP,VIACSAB,VolMIP	C4MIP,CFMIP,CMIP,DAMIP,DCPP,FAFMIP,GMMIP,GeoMIP,HighResMIP,ISMIP6,LS3MIP,LUMIP,PMIP,RFMIP,ScenarioMIP,VolMIP
1	Surface Downwelling Longwave Radiation	W m-2			rlds	surface_downwelling_longwave_flux_in_air	area: time: mean	down	real	longitude latitude time	rlds	atmos	mon	area: areacella	Amon ((isd.003))	Amon_2d	34	bab52da8-e5dd-11e5-8482-ac72891c3257	70d7d6fc0e9c2f14624a0270bf2b99b9	f7dcac96-562c-11e6-a2a4-ac72891c3257	Temporal mean, Global field (single level) [XY-na] [am-tm]	30.0 r	520.0 r	260.0 r	330.0 r	AerChemMIP,C4MIP,CFMIP,CMIP,DAMIP,DCPP,FAFMIP,GMMIP,GeoMIP,HighResMIP,ISMIP6,LS3MIP,LUMIP,PMIP,RFMIP,VIACSAB,VolMIP	C4MIP,CFMIP,CMIP,DAMIP,DCPP,FAFMIP,GMMIP,GeoMIP,HighResMIP,ISMIP6,LS3MIP,LUMIP,PMIP,RFMIP,ScenarioMIP,VolMIP
1	Surface Upwelling Longwave Radiation	W m-2			rlus	surface_upwelling_longwave_flux_in_air	area: time: mean	up	real	longitude latitude time	rlus	atmos	mon	area: areacella	Amon ((isd.003))	Amon_2d	35	bab578d0-e5dd-11e5-8482-ac72891c3257	89027ee0079acb709750ddeac1c08899	f7dcac96-562c-11e6-a2a4-ac72891c3257	Temporal mean, Global field (single level) [XY-na] [am-tm]	43.0 r	660.0 r	320.0 r	380.0 r	AerChemMIP,C4MIP,CFMIP,CMIP,DAMIP,FAFMIP,GMMIP,GeoMIP,HighResMIP,ISMIP6,LS3MIP,LUMIP,PMIP,RFMIP,VIACSAB,VolMIP	C4MIP,CFMIP,CMIP,DAMIP,DCPP,FAFMIP,GMMIP,GeoMIP,HighResMIP,ISMIP6,LS3MIP,LUMIP,PMIP,RFMIP,ScenarioMIP,VolMIP
1	Surface Downwelling Shortwave Radiation	W m-2	surface solar irradiance for UV calculations		rsds	surface_downwelling_shortwave_flux_in_air	area: time: mean	down	real	longitude latitude time	rsds	atmos	mon	area: areacella	Amon ((isd.003))	Amon_2d	36	bab5e1b2-e5dd-11e5-8482-ac72891c3257	6e7b9f984d3bba15daccaaa18039a85d	f7dcac96-562c-11e6-a2a4-ac72891c3257	Temporal mean, Global field (single level) [XY-na] [am-tm]	-0.1 r	550.0 r	120.0 r	200.0 r	AerChemMIP,C4MIP,CFMIP,CMIP,DAMIP,DCPP,FAFMIP,GMMIP,GeoMIP,HighResMIP,ISMIP6,LS3MIP,LUMIP,PMIP,RFMIP,VIACSAB,VolMIP	C4MIP,CFMIP,CMIP,DAMIP,DCPP,FAFMIP,GMMIP,GeoMIP,HighResMIP,ISMIP6,LS3MIP,LUMIP,PMIP,RFMIP,ScenarioMIP,VolMIP
1	Surface Upwelling Shortwave Radiation	W m-2			rsus	surface_upwelling_shortwave_flux_in_air	area: time: mean	up	real	longitude latitude time	rsus	atmos	mon	area: areacella	Amon ((isd.003))	Amon_2d	37	bab6537c-e5dd-11e5-8482-ac72891c3257	70bf79db957daa3b82413da949233ac7	f7dcac96-562c-11e6-a2a4-ac72891c3257	Temporal mean, Global field (single level) [XY-na] [am-tm]	-0.1 r	480.0 r	10.0 r	90.0 r	AerChemMIP,C4MIP,CFMIP,CMIP,DAMIP,FAFMIP,GMMIP,GeoMIP,HighResMIP,ISMIP6,LS3MIP,LUMIP,PMIP,RFMIP,VIACSAB,VolMIP	C4MIP,CFMIP,CMIP,DAMIP,DCPP,FAFMIP,GMMIP,GeoMIP,HighResMIP,ISMIP6,LS3MIP,LUMIP,PMIP,RFMIP,ScenarioMIP,VolMIP
1	Surface Downwelling Clear-Sky Shortwave Radiation	W m-2	surface solar irradiance clear sky for UV calculations		rsdscs	surface_downwelling_shortwave_flux_in_air_assuming_clear_sky	area: time: mean	down	real	longitude latitude time	rsdscs	atmos	mon	area: areacella	Amon ((isd.003))	Amon_2d	38	bab607c8-e5dd-11e5-8482-ac72891c3257	d0a35d5c99a0aa93ad4069cfe83bf748	f7dcac96-562c-11e6-a2a4-ac72891c3257	Temporal mean, Global field (single level) [XY-na] [am-tm]					AerChemMIP,C4MIP,CFMIP,CMIP,DAMIP,FAFMIP,GMMIP,GeoMIP,HighResMIP,ISMIP6,LS3MIP,LUMIP,PMIP,RFMIP,VIACSAB,VolMIP	C4MIP,CFMIP,CMIP,DAMIP,FAFMIP,GMMIP,GeoMIP,HighResMIP,ISMIP6,LS3MIP,LUMIP,PMIP,RFMIP,ScenarioMIP,VolMIP
1	Surface Upwelling Clear-Sky Shortwave Radiation	W m-2	Surface Upwelling Clear-sky Shortwave Radiation		rsuscs	surface_upwelling_shortwave_flux_in_air_assuming_clear_sky	area: time: mean	up	real	longitude latitude time	rsuscs	atmos	mon	area: areacella	Amon ((isd.003))	Amon_2d	39	bab670b4-e5dd-11e5-8482-ac72891c3257	90df05fe3dcd9fe0c9b48aaa74b5e9e2	f7dcac96-562c-11e6-a2a4-ac72891c3257	Temporal mean, Global field (single level) [XY-na] [am-tm]	-0.1 r	480.0 r	10.0 r	90.0 r	AerChemMIP,C4MIP,CFMIP,CMIP,DAMIP,FAFMIP,GMMIP,GeoMIP,HighResMIP,ISMIP6,LS3MIP,LUMIP,PMIP,RFMIP,VIACSAB,VolMIP	C4MIP,CFMIP,CMIP,DAMIP,FAFMIP,GMMIP,GeoMIP,HighResMIP,ISMIP6,LS3MIP,LUMIP,PMIP,RFMIP,ScenarioMIP,VolMIP
1	Surface Downwelling Clear-Sky Longwave Radiation	W m-2	Surface downwelling clear-sky longwave radiation		rldscs	surface_downwelling_longwave_flux_in_air_assuming_clear_sky	area: time: mean	down	real	longitude latitude time	rldscs	atmos	mon	area: areacella	Amon ((isd.003))	Amon_2d	40	bab5540e-e5dd-11e5-8482-ac72891c3257	7b2d1e1a3ece1169d8ac61af4b758ed2	f7dcac96-562c-11e6-a2a4-ac72891c3257	Temporal mean, Global field (single level) [XY-na] [am-tm]	25.0 r	550.0 r	220.0 r	310.0 r	AerChemMIP,C4MIP,CFMIP,CMIP,DAMIP,FAFMIP,GMMIP,GeoMIP,HighResMIP,ISMIP6,LS3MIP,LUMIP,PMIP,RFMIP,VIACSAB,VolMIP	C4MIP,CFMIP,CMIP,DAMIP,FAFMIP,GMMIP,GeoMIP,HighResMIP,ISMIP6,LS3MIP,LUMIP,PMIP,RFMIP,ScenarioMIP,VolMIP
1	TOA Incident Shortwave Radiation	W m-2	Shortwave radiation incident at the top of the atmosphere	at the top of the atmosphere	rsdt	toa_incoming_shortwave_flux	area: time: mean	down	real	longitude latitude time	rsdt	atmos	mon	area: areacella	Amon ((isd.003))	Amon_2d	41	bab6219a-e5dd-11e5-8482-ac72891c3257	a21e250a10f96b1c1ad6d742206a157e	f7dcac96-562c-11e6-a2a4-ac72891c3257	Temporal mean, Global field (single level) [XY-na] [am-tm]	0.0 s	580.4 s	282.6 s	315.8 s	AerChemMIP,C4MIP,CFMIP,CMIP,DAMIP,DCPP,FAFMIP,GMMIP,GeoMIP,HighResMIP,ISMIP6,LS3MIP,LUMIP,PMIP,RFMIP,VIACSAB,VolMIP	C4MIP,CFMIP,CMIP,DAMIP,DCPP,FAFMIP,GMMIP,GeoMIP,HighResMIP,ISMIP6,LS3MIP,LUMIP,PMIP,RFMIP,ScenarioMIP,VolMIP
1	Top-of-Atmosphere Outgoing Shortwave Radiation	W m-2	at the top of the atmosphere	at the top of the atmosphere	rsut	toa_outgoing_shortwave_flux	area: time: mean	up	real	longitude latitude time	rsut	atmos	mon	area: areacella	Amon ((isd.003))	Amon_2d	42	bab68ebe-e5dd-11e5-8482-ac72891c3257	b907fef85d4c9571a9457ee1b259bb8f	f7dcac96-562c-11e6-a2a4-ac72891c3257	Temporal mean, Global field (single level) [XY-na] [am-tm]	-0.1 r	480.0 r	60.0 r	160.0 r	AerChemMIP,C4MIP,CFMIP,CMIP,DAMIP,DCPP,FAFMIP,GMMIP,GeoMIP,HighResMIP,ISMIP6,LS3MIP,LUMIP,PMIP,RFMIP,VIACSAB,VolMIP	C4MIP,CFMIP,CMIP,DAMIP,DCPP,FAFMIP,GMMIP,GeoMIP,HighResMIP,ISMIP6,LS3MIP,LUMIP,PMIP,RFMIP,ScenarioMIP,VolMIP
1	TOA Outgoing Longwave Radiation	W m-2	at the top of the atmosphere (to be compared with satellite measurements)	at the top of the atmosphere (to be compared with satellite measurements)	rlut	toa_outgoing_longwave_flux	area: time: mean	up	real	longitude latitude time	rlut	atmos	mon	area: areacella	Amon ((isd.003))	Amon_2d	43	bab5aad0-e5dd-11e5-8482-ac72891c3257	63345d9732c72b97ca395f24ce2d6642	f7dcac96-562c-11e6-a2a4-ac72891c3257	Temporal mean, Global field (single level) [XY-na] [am-tm]	65.0 r	385.0 r	205.0 r	305.0 r	AerChemMIP,C4MIP,CFMIP,CMIP,DAMIP,DCPP,FAFMIP,GMMIP,GeoMIP,HighResMIP,ISMIP6,LS3MIP,LUMIP,PMIP,RFMIP,VIACSAB,VolMIP	C4MIP,CFMIP,CMIP,DAMIP,DCPP,FAFMIP,GMMIP,GeoMIP,HighResMIP,ISMIP6,LS3MIP,LUMIP,PMIP,RFMIP,ScenarioMIP,VolMIP
1	TOA Outgoing Clear-sky Longwave Radiation	W m-2			rlutcs	toa_outgoing_longwave_flux_assuming_clear_sky	area: time: mean	up	real	longitude latitude time	rlutcs	atmos	mon	area: areacella	Amon ((isd.003))	Amon_2d	44	bab5bcdc-e5dd-11e5-8482-ac72891c3257	921b8b8f6620826567d9324314c70410	f7dcac96-562c-11e6-a2a4-ac72891c3257	Temporal mean, Global field (single level) [XY-na] [am-tm]	65.0 r	390.0 r	220.0 r	270.0 r	AerChemMIP,C4MIP,CFMIP,CMIP,DAMIP,DCPP,FAFMIP,GMMIP,GeoMIP,HighResMIP,ISMIP6,LS3MIP,LUMIP,PMIP,RFMIP,VIACSAB,VolMIP	C4MIP,CFMIP,CMIP,DAMIP,DCPP,FAFMIP,GMMIP,GeoMIP,HighResMIP,ISMIP6,LS3MIP,LUMIP,PMIP,RFMIP,ScenarioMIP,VolMIP
1	TOA Outgoing Clear-Sky Shortwave Radiation	W m-2	Calculated in the absence of clouds.		rsutcs	toa_outgoing_shortwave_flux_assuming_clear_sky	area: time: mean	up	real	longitude latitude time	rsutcs	atmos	mon	area: areacella	Amon ((isd.003))	Amon_2d	45	bab69c06-e5dd-11e5-8482-ac72891c3257	12e0369ff0ba1a6f1a84e0d9565d4b07	f7dcac96-562c-11e6-a2a4-ac72891c3257	Temporal mean, Global field (single level) [XY-na] [am-tm]	-0.1 r	480.0 r	30.0 r	120.0 r	AerChemMIP,C4MIP,CFMIP,CMIP,DAMIP,DCPP,FAFMIP,GMMIP,GeoMIP,HighResMIP,ISMIP6,LS3MIP,LUMIP,PMIP,RFMIP,VIACSAB,VolMIP	C4MIP,CFMIP,CMIP,DAMIP,DCPP,FAFMIP,GMMIP,GeoMIP,HighResMIP,ISMIP6,LS3MIP,LUMIP,PMIP,RFMIP,ScenarioMIP,VolMIP
1	Water Vapor Path	kg m-2	vertically integrated through the atmospheric column	vertically integrated through the atmospheric column	prw	atmosphere_water_vapor_content	area: time: mean		real	longitude latitude time	prw	atmos	mon	area: areacella	Amon ((isd.003))	Amon_2d	46	bab45df6-e5dd-11e5-8482-ac72891c3257	fc637f1c75e58be8a6e4112411a00f36	f7dcac96-562c-11e6-a2a4-ac72891c3257	Temporal mean, Global field (single level) [XY-na] [am-tm]	0.0 r	90.0 r	12.0 r	26.0 r	AerChemMIP,C4MIP,CFMIP,CMIP,DAMIP,FAFMIP,GMMIP,GeoMIP,HighResMIP,ISMIP6,LS3MIP,LUMIP,PMIP,RFMIP,VIACSAB,VolMIP	C4MIP,CFMIP,CMIP,DAMIP,FAFMIP,GMMIP,GeoMIP,HighResMIP,ISMIP6,LS3MIP,LUMIP,PMIP,RFMIP,ScenarioMIP,VolMIP
1	Total Cloud Cover Percentage	%	Total cloud area fraction for the whole atmospheric column, as seen from the surface or the top of the atmosphere. Includes both large-scale and convective cloud.	for the whole atmospheric column, as seen from the surface or the top of the atmosphere. Include both large-scale and convective cloud.	clt	cloud_area_fraction	area: time: mean		real	longitude latitude time	clt	atmos	mon	area: areacella	Amon ((isd.003))	Amon_2d	47	baaad7e0-e5dd-11e5-8482-ac72891c3257	7c2249d424dde72f8616d42870a9d425	f7dcac96-562c-11e6-a2a4-ac72891c3257	Temporal mean, Global field (single level) [XY-na] [am-tm]	-0.001 r	100.001 r	10.0 r	90.0 r	AerChemMIP,C4MIP,CFMIP,CMIP,DAMIP,DCPP,FAFMIP,GMMIP,GeoMIP,HighResMIP,ISMIP6,LS3MIP,LUMIP,PMIP,RFMIP,VIACSAB,VolMIP	C4MIP,CFMIP,CMIP,DAMIP,DCPP,FAFMIP,GMMIP,GeoMIP,HighResMIP,ISMIP6,LS3MIP,LUMIP,PMIP,RFMIP,ScenarioMIP,VolMIP
1	Condensed Water Path	kg m-2	Mass of condensed (liquid + ice) water in the column divided by the area of the column (not just the area of the cloudy portion of the column). Includes precipitating hydrometeors ONLY if the precipitating hydrometeors affect the calculation of radiative transfer in model.	mass of condensed (liquid + ice) water in the column divided by the area of the column (not just the area of the cloudy portion of the column). Includes precipitating hydrometeors ONLY if the precipitating hydrometeor affects the calculation of radiative transfer in model.	clwvi	atmosphere_cloud_condensed_water_content	area: time: mean		real	longitude latitude time	clwvi	atmos	mon	area: areacella	Amon ((isd.003))	Amon_2d	48	baab1818-e5dd-11e5-8482-ac72891c3257	80a1dd605b563e9f09c718a5ba9cb9cc	f7dcac96-562c-11e6-a2a4-ac72891c3257	Temporal mean, Global field (single level) [XY-na] [am-tm]	-3.827e-06 s	3.364 s	-0.03549 s	0.2846 s	AerChemMIP,C4MIP,CFMIP,CMIP,DAMIP,FAFMIP,GMMIP,GeoMIP,HighResMIP,ISMIP6,LS3MIP,LUMIP,PMIP,RFMIP,VolMIP	C4MIP,CFMIP,CMIP,DAMIP,FAFMIP,GMMIP,GeoMIP,HighResMIP,ISMIP6,LS3MIP,LUMIP,PMIP,RFMIP,ScenarioMIP,VolMIP
1	Ice Water Path	kg m-2	mass of ice water in the column divided by the area of the column (not just the area of the cloudy portion of the column). Includes precipitating frozen hydrometeors ONLY if the precipitating hydrometeor affects the calculation of radiative transfer in model.	mass of ice water in the column divided by the area of the column (not just the area of the cloudy portion of the column). Includes precipitating frozen hydrometeors ONLY if the precipitating hydrometeor affects the calculation of radiative transfer in model.	clivi	atmosphere_cloud_ice_content	area: time: mean		real	longitude latitude time	clivi	atmos	mon	area: areacella	Amon ((isd.003))	Amon_2d	49	baaa9852-e5dd-11e5-8482-ac72891c3257	73c496f5669cc122cf1cddfe4df2a27a	f7dcac96-562c-11e6-a2a4-ac72891c3257	Temporal mean, Global field (single level) [XY-na] [am-tm]	-1.872e-06 s	1.535 s	-0.0348 s	0.1187 s	AerChemMIP,C4MIP,CFMIP,CMIP,DAMIP,FAFMIP,GMMIP,GeoMIP,HighResMIP,ISMIP6,LS3MIP,LUMIP,PMIP,RFMIP,VolMIP	C4MIP,CFMIP,CMIP,DAMIP,FAFMIP,GMMIP,GeoMIP,HighResMIP,ISMIP6,LS3MIP,LUMIP,PMIP,RFMIP,ScenarioMIP,VolMIP
1	Net Downward Radiative Flux at Top of Model	W m-2	Net Downward Radiative Flux at Top of Model : I.e., at the top of that portion of the atmosphere where dynamics are explicitly treated by the model. This is reported only if it differs from the net downward radiative flux at the top of the atmosphere.	i.e., at the top of that portion of the atmosphere where dynamics are explicitly treated by the model. This is reported only if it differs from the net downward radiative flux at the top of the atmosphere.	rtmt	net_downward_radiative_flux_at_top_of_atmosphere_model	area: time: mean	down	real	longitude latitude time	rtmt	atmos	mon	area: areacella	Amon ((isd.003))	Amon_2d	50	bab6a91c-e5dd-11e5-8482-ac72891c3257	26328c46dfcc65d454b6fd4c52ccb48f	f7dcac96-562c-11e6-a2a4-ac72891c3257	Temporal mean, Global field (single level) [XY-na] [am-tm]	-250.0 r	250.0 r	40.0 r	150.0 r	AerChemMIP,C4MIP,CFMIP,CMIP,DAMIP,FAFMIP,GMMIP,GeoMIP,HighResMIP,ISMIP6,LS3MIP,LUMIP,PMIP,RFMIP,VolMIP	C4MIP,CFMIP,CMIP,DAMIP,FAFMIP,GMMIP,GeoMIP,HighResMIP,ISMIP6,LS3MIP,LUMIP,PMIP,RFMIP,ScenarioMIP,VolMIP
1	Fraction of Time Convection Occurs in Cell	1.0	Fraction of time that convection occurs in the grid cell.	Fraction of time that convection occurs in the grid cell .	ci	convection_time_fraction	area: time: mean		real	longitude latitude time	ci	atmos	mon	area: areacella	Amon ((isd.003))	Amon_2d	53	baaa3984-e5dd-11e5-8482-ac72891c3257	29fae9ea0f236a3eb144026e1bafde28	f7dcac96-562c-11e6-a2a4-ac72891c3257	Temporal mean, Global field (single level) [XY-na] [am-tm]	-0.001 r	1.001 r	0.02 s	0.9 s	AerChemMIP,C4MIP,CFMIP,CMIP,DAMIP,FAFMIP,GMMIP,GeoMIP,HighResMIP,ISMIP6,LS3MIP,LUMIP,PMIP,RFMIP,VIACSAB,VolMIP	C4MIP,CFMIP,CMIP,DAMIP,DCPP,FAFMIP,GMMIP,GeoMIP,HighResMIP,ISMIP6,LS3MIP,LUMIP,PMIP,RFMIP,ScenarioMIP,VolMIP
1	Percentage Cloud Cover	%	Percentage cloud cover, including both large-scale and convective cloud.	Includes both large-scale and convective cloud.	cl	cloud_area_fraction_in_atmosphere_layer	area: time: mean		real	longitude latitude alevel time	cl	atmos	mon	area: areacella	Amon ((isd.003))	Amon_oth	58	baaa4302-e5dd-11e5-8482-ac72891c3257	e0ecf1c1305c1bdc69bee0e7ba1e2e03	62eebe98-1617-11e7-a126-5404a60d96b5	Temporal mean, Global field on model atmosphere levels [XY-A]	0.0 s	105.0 s	-0.04479 s	26.07 s	AerChemMIP,C4MIP,CFMIP,CMIP,DAMIP,FAFMIP,GMMIP,GeoMIP,HighResMIP,LS3MIP,LUMIP,PMIP,RFMIP,VIACSAB,VolMIP	C4MIP,CFMIP,CMIP,DAMIP,FAFMIP,GMMIP,GeoMIP,HighResMIP,LS3MIP,LUMIP,PMIP,RFMIP,ScenarioMIP,VolMIP
1	Mass Fraction of Cloud Liquid Water	kg kg-1	Includes both large-scale and convective cloud. Calculate as the mass of cloud liquid water in the grid cell divided by the mass of air (including the water in all phases) in the grid cells. Precipitating hydrometeors are included ONLY if the precipitating hydrometeors affect the calculation of radiative transfer in model.	Includes both large-scale and convective cloud. Calculate as the mass of cloud liquid water in the grid cell divided by the mass of air (including the water in all phases) in the grid cells. Precipitating hydrometeors are included ONLY if the precipitating hydrometeors affect the calculation of radiative transfer in model.	clw	mass_fraction_of_cloud_liquid_water_in_air	area: time: mean		real	longitude latitude alevel time	clw	atmos	mon	area: areacella	Amon ((isd.003))	Amon_oth	59	baab0382-e5dd-11e5-8482-ac72891c3257	86b2b3318a73839edfafa9d46864aadc	62eebe98-1617-11e7-a126-5404a60d96b5	Temporal mean, Global field on model atmosphere levels [XY-A]					AerChemMIP,C4MIP,CFMIP,CMIP,DAMIP,FAFMIP,GMMIP,GeoMIP,HighResMIP,LS3MIP,LUMIP,PMIP,RFMIP,VIACSAB,VolMIP	C4MIP,CFMIP,CMIP,DAMIP,FAFMIP,GMMIP,GeoMIP,HighResMIP,LS3MIP,LUMIP,PMIP,RFMIP,ScenarioMIP,VolMIP
1	Air Temperature	K	Air Temperature		ta	air_temperature	time: mean		real	longitude latitude plev19 time	ta	atmos	mon	area: areacella	Amon ((isd.003))	Amon_oth	62	bab8fa0a-e5dd-11e5-8482-ac72891c3257	b9c3eb96337c69c1c4a5aab1317f5563	f947ce0e-80ba-11e6-ab6e-5404a60d96b5	Temporal mean, Global field (19 pressure levels) [XY-P19] [tmean]	157.1 s	336.3 s	194.3 s	299.8 s	AerChemMIP,C4MIP,CFMIP,CMIP,DAMIP,DCPP,DynVar,FAFMIP,GMMIP,GeoMIP,HighResMIP,LS3MIP,LUMIP,PMIP,RFMIP,VIACSAB,VolMIP	C4MIP,CFMIP,CMIP,DAMIP,DCPP,FAFMIP,GMMIP,GeoMIP,HighResMIP,LS3MIP,LUMIP,PMIP,RFMIP,ScenarioMIP,VolMIP
1	Eastward Wind	m s-1			ua	eastward_wind	time: mean		real	longitude latitude plev19 time	ua	atmos	mon	area: areacella	Amon ((isd.003))	Amon_oth	63	babb4b34-e5dd-11e5-8482-ac72891c3257	21db90c0a12448299f855fdab60930d4	f947ce0e-80ba-11e6-ab6e-5404a60d96b5	Temporal mean, Global field (19 pressure levels) [XY-P19] [tmean]	-68.65 s	136.6 s	1.101 s	22.42 s	AerChemMIP,C4MIP,CFMIP,CMIP,DAMIP,DCPP,DynVar,FAFMIP,GMMIP,GeoMIP,HighResMIP,LS3MIP,LUMIP,PMIP,RFMIP,VIACSAB,VolMIP	C4MIP,CFMIP,CMIP,DAMIP,DCPP,FAFMIP,GMMIP,GeoMIP,HighResMIP,LS3MIP,LUMIP,PMIP,RFMIP,ScenarioMIP,VolMIP
1	Northward Wind	m s-1			va	northward_wind	time: mean		real	longitude latitude plev19 time	va	atmos	mon	area: areacella	Amon ((isd.003))	Amon_oth	64	babbb25e-e5dd-11e5-8482-ac72891c3257	2dedcb347c18e132a2f4d625abf94585	f947ce0e-80ba-11e6-ab6e-5404a60d96b5	Temporal mean, Global field (19 pressure levels) [XY-P19] [tmean]	-71.1 s	69.93 s	0.9886 s	4.679 s	AerChemMIP,C4MIP,CFMIP,CMIP,DAMIP,DCPP,DynVar,FAFMIP,GMMIP,GeoMIP,HighResMIP,LS3MIP,LUMIP,PMIP,RFMIP,VIACSAB,VolMIP	C4MIP,CFMIP,CMIP,DAMIP,DCPP,FAFMIP,GMMIP,GeoMIP,HighResMIP,LS3MIP,LUMIP,PMIP,RFMIP,ScenarioMIP,VolMIP
1	Specific Humidity	1.0			hus	specific_humidity	time: mean		real	longitude latitude plev19 time	hus	atmos	mon	area: areacella	Amon ((isd.003))	Amon_oth	65	bab00b98-e5dd-11e5-8482-ac72891c3257	53f4724d228998d54191c73352532ce3	f947ce0e-80ba-11e6-ab6e-5404a60d96b5	Temporal mean, Global field (19 pressure levels) [XY-P19] [tmean]	-0.000299 s	0.02841 s	-0.0003539 s	0.01041 s	AerChemMIP,C4MIP,CFMIP,CMIP,DAMIP,DCPP,DynVar,FAFMIP,GMMIP,GeoMIP,HighResMIP,LS3MIP,LUMIP,PMIP,RFMIP,VIACSAB,VolMIP	C4MIP,CFMIP,CMIP,DAMIP,DCPP,FAFMIP,GMMIP,GeoMIP,HighResMIP,LS3MIP,LUMIP,PMIP,RFMIP,ScenarioMIP,VolMIP
1	Relative Humidity	%	The relative humidity with respect to liquid water for T> 0 C, and with respect to ice for T<0 C.	This is the relative humidity with respect to liquid water for T> 0 C, and with respect to ice for T<0 C.	hur	relative_humidity	time: mean		real	longitude latitude plev19 time	hur	atmos	mon	area: areacella	Amon ((isd.003))	Amon_oth	66	baafe578-e5dd-11e5-8482-ac72891c3257	3cc6766c2d001a58d18dfe7f60fd5e66	f947ce0e-80ba-11e6-ab6e-5404a60d96b5	Temporal mean, Global field (19 pressure levels) [XY-P19] [tmean]	-0.001 r	105.0 r	10.0 r	90.0 r	AerChemMIP,C4MIP,CFMIP,CMIP,DAMIP,FAFMIP,GMMIP,GeoMIP,HighResMIP,LS3MIP,LUMIP,PMIP,RFMIP,VIACSAB,VolMIP	C4MIP,CFMIP,CMIP,DAMIP,FAFMIP,GMMIP,GeoMIP,HighResMIP,LS3MIP,LUMIP,PMIP,RFMIP,ScenarioMIP,VolMIP
1	omega (=dp/dt)	Pa s-1	Omega (vertical velocity in pressure coordinates, positive downwards)	commonly referred to as "omega", this represents the vertical component of velocity in pressure coordinates (positive down)	wap	lagrangian_tendency_of_air_pressure	time: mean		real	longitude latitude plev19 time	wap	atmos	mon	area: areacella	Amon ((isd.003))	Amon_oth	67	babd0906-e5dd-11e5-8482-ac72891c3257	51fb29dd55442361fa9c5dbe23aca9c6	f947ce0e-80ba-11e6-ab6e-5404a60d96b5	Temporal mean, Global field (19 pressure levels) [XY-P19] [tmean]	-1.126 s	2.319 s	-0.005083 s	0.04256 s	AerChemMIP,C4MIP,CFMIP,CMIP,DAMIP,DCPP,DynVar,FAFMIP,GMMIP,GeoMIP,HighResMIP,LS3MIP,LUMIP,PMIP,RFMIP,VIACSAB,VolMIP	C4MIP,CFMIP,CMIP,DAMIP,DCPP,FAFMIP,GMMIP,GeoMIP,HighResMIP,LS3MIP,LUMIP,PMIP,RFMIP,ScenarioMIP,VolMIP
1	Geopotential Height	m			zg	geopotential_height	time: mean		real	longitude latitude plev19 time	zg	atmos	mon	area: areacella	Amon ((isd.003))	Amon_oth	68	babd9ace-e5dd-11e5-8482-ac72891c3257	28e774ec0ecd561a6a3d437e6c443a6b	f947ce0e-80ba-11e6-ab6e-5404a60d96b5	Temporal mean, Global field (19 pressure levels) [XY-P19] [tmean]	-719.7 s	34370.0 s	-113.4 s	32990.0 s	AerChemMIP,C4MIP,CFMIP,CMIP,DAMIP,DCPP,DynVar,FAFMIP,GMMIP,GeoMIP,HighResMIP,LS3MIP,LUMIP,PMIP,RFMIP,VIACSAB,VolMIP	C4MIP,CFMIP,CMIP,DAMIP,DCPP,FAFMIP,GMMIP,GeoMIP,HighResMIP,LS3MIP,LUMIP,PMIP,RFMIP,ScenarioMIP,VolMIP
1	CO2 volume mixing ratio	mol mol-1			co2	mole_fraction_of_carbon_dioxide_in_air	time: mean		real	longitude latitude plev19 time	co2	atmos	mon	area: areacella	Amon ((isd.003))	Amon_oth	71	baab23da-e5dd-11e5-8482-ac72891c3257	9bb9a503065dfbd30c9bbe5c3c6abf99	f947ce0e-80ba-11e6-ab6e-5404a60d96b5	Temporal mean, Global field (19 pressure levels) [XY-P19] [tmean]					AerChemMIP,C4MIP,CFMIP,CMIP,DAMIP,FAFMIP,GMMIP,GeoMIP,HighResMIP,LS3MIP,LUMIP,PMIP,RFMIP,VolMIP	C4MIP,CFMIP,CMIP,DAMIP,FAFMIP,GMMIP,GeoMIP,HighResMIP,LS3MIP,LUMIP,PMIP,RFMIP,ScenarioMIP,VolMIP
1	CO2 volume mixing ratio	mol mol-1			co2	mole_fraction_of_carbon_dioxide_in_air	area: mean time: mean within years time: mean over years		real	longitude latitude plev19 time2	co2Clim	atmos	monClim	area: areacella	Amon ((isd.003))	Amon_oth	72	a92dfd68-817c-11e6-a4e2-5404a60d96b5	9bb9a503065dfbd30c9bbe5c3c6abf99	e9f98ed8-c1ce-11e6-8067-ac72891c3257	Climatological mean, Global field (19 pressure levels) [XY-P19] [aclim]					AerChemMIP,C4MIP,CFMIP,CMIP,DAMIP,FAFMIP,GMMIP,GeoMIP,HighResMIP,LS3MIP,LUMIP,PMIP,RFMIP,VolMIP	C4MIP,CFMIP,CMIP,DAMIP,FAFMIP,GMMIP,GeoMIP,HighResMIP,LS3MIP,LUMIP,PMIP,RFMIP,ScenarioMIP,VolMIP
1	Total Atmospheric Mass of CO2	kg	Total atmospheric mass of Carbon Dioxide		co2mass	atmosphere_mass_of_carbon_dioxide	area: time: mean		real	time	co2mass	atmos	mon		Amon ((isd.003))	Amon_oth	73	baab2d9e-e5dd-11e5-8482-ac72891c3257	ddf060894b16cf89e906ecfedbba4ffb	e9fb0b1e-c1ce-11e6-8067-ac72891c3257	Temporal mean, Global mean/constant [na-na]					AerChemMIP,C4MIP,CFMIP,CMIP,DAMIP,FAFMIP,GMMIP,GeoMIP,HighResMIP,LS3MIP,LUMIP,PMIP,RFMIP,VolMIP	C4MIP,CFMIP,CMIP,DAMIP,FAFMIP,GMMIP,GeoMIP,HighResMIP,LS3MIP,LUMIP,PMIP,RFMIP,ScenarioMIP,VolMIP
1	Total Atmospheric Mass of CO2	kg	Total atmospheric mass of Carbon Dioxide		co2mass	atmosphere_mass_of_carbon_dioxide	area: mean time: mean within years time: mean over years		real	time2	co2massClim	atmos	monClim		Amon ((isd.003))	Amon_oth	74	a92e1244-817c-11e6-a4e2-5404a60d96b5	ddf060894b16cf89e906ecfedbba4ffb	e9f96386-c1ce-11e6-8067-ac72891c3257	Climatological mean, Global mean/constant [na-na] [aclim]					AerChemMIP,C4MIP,CFMIP,CMIP,DAMIP,FAFMIP,GMMIP,GeoMIP,HighResMIP,LS3MIP,LUMIP,PMIP,RFMIP,VolMIP	C4MIP,CFMIP,CMIP,DAMIP,FAFMIP,GMMIP,GeoMIP,HighResMIP,LS3MIP,LUMIP,PMIP,RFMIP,ScenarioMIP,VolMIP
1	CH4 volume mixing ratio	mol mol-1			ch4	mole_fraction_of_methane_in_air	time: mean		real	longitude latitude plev19 time	ch4	atmos atmosChem	mon	area: areacella	Amon ((isd.003))	Amon_oth	75	baa9d642-e5dd-11e5-8482-ac72891c3257	7f4c49e8abe3230e87fa7299b73448fa	f947ce0e-80ba-11e6-ab6e-5404a60d96b5	Temporal mean, Global field (19 pressure levels) [XY-P19] [tmean]					AerChemMIP,C4MIP,CFMIP,CMIP,DAMIP,FAFMIP,GMMIP,GeoMIP,HighResMIP,LS3MIP,LUMIP,PMIP,RFMIP,VolMIP	C4MIP,CFMIP,CMIP,DAMIP,FAFMIP,GMMIP,GeoMIP,HighResMIP,LS3MIP,LUMIP,PMIP,RFMIP,ScenarioMIP,VolMIP
1	CH4 volume mixing ratio	mol mol-1			ch4	mole_fraction_of_methane_in_air	area: mean time: mean within years time: mean over years		real	longitude latitude plev19 time2	ch4Clim	atmos atmosChem	monClim	area: areacella	Amon ((isd.003))	Amon_oth	76	a92e26e4-817c-11e6-a4e2-5404a60d96b5	7f4c49e8abe3230e87fa7299b73448fa	e9f98ed8-c1ce-11e6-8067-ac72891c3257	Climatological mean, Global field (19 pressure levels) [XY-P19] [aclim]					AerChemMIP,C4MIP,CFMIP,CMIP,DAMIP,FAFMIP,GMMIP,GeoMIP,HighResMIP,LS3MIP,LUMIP,PMIP,RFMIP,VolMIP	C4MIP,CFMIP,CMIP,DAMIP,FAFMIP,GMMIP,GeoMIP,HighResMIP,LS3MIP,LUMIP,PMIP,RFMIP,ScenarioMIP,VolMIP
1	Global Mean Mole Fraction of CH4	1e-09	Global Mean Mole Fraction of CH4		ch4global	mole_fraction_of_methane_in_air	area: time: mean		real	time	ch4global	atmos atmosChem	mon		Amon ((isd.003))	Amon_oth	77	baa9e22c-e5dd-11e5-8482-ac72891c3257	dbc244f3e0bae5b1397ad42fb6cd6db3	e9fb0b1e-c1ce-11e6-8067-ac72891c3257	Temporal mean, Global mean/constant [na-na]					AerChemMIP,C4MIP,CFMIP,CMIP,DAMIP,FAFMIP,GMMIP,GeoMIP,HighResMIP,LS3MIP,LUMIP,PMIP,RFMIP,VolMIP	C4MIP,CFMIP,CMIP,DAMIP,FAFMIP,GMMIP,GeoMIP,HighResMIP,LS3MIP,LUMIP,PMIP,RFMIP,ScenarioMIP,VolMIP
1	Global Mean Mole Fraction of CH4	1e-09	Global Mean Mole Fraction of CH4		ch4global	mole_fraction_of_methane_in_air	area: mean time: mean within years time: mean over years		real	time2	ch4globalClim	atmos atmosChem	monClim		Amon ((isd.003))	Amon_oth	78	a92e3b16-817c-11e6-a4e2-5404a60d96b5	dbc244f3e0bae5b1397ad42fb6cd6db3	e9f96386-c1ce-11e6-8067-ac72891c3257	Climatological mean, Global mean/constant [na-na] [aclim]					AerChemMIP,C4MIP,CFMIP,CMIP,DAMIP,FAFMIP,GMMIP,GeoMIP,HighResMIP,LS3MIP,LUMIP,PMIP,RFMIP,VolMIP	C4MIP,CFMIP,CMIP,DAMIP,FAFMIP,GMMIP,GeoMIP,HighResMIP,LS3MIP,LUMIP,PMIP,RFMIP,ScenarioMIP,VolMIP
1	N2O volume mixing ratio	mol mol-1			n2o	mole_fraction_of_nitrous_oxide_in_air	time: mean		real	longitude latitude plev19 time	n2o	atmos atmosChem	mon	area: areacella	Amon ((isd.003))	Amon_oth	79	bab2124e-e5dd-11e5-8482-ac72891c3257	942125e5a461fef57b1477b9a2bd5fa0	f947ce0e-80ba-11e6-ab6e-5404a60d96b5	Temporal mean, Global field (19 pressure levels) [XY-P19] [tmean]					AerChemMIP,C4MIP,CFMIP,CMIP,DAMIP,FAFMIP,GMMIP,GeoMIP,HighResMIP,LS3MIP,LUMIP,PMIP,RFMIP,VolMIP	C4MIP,CFMIP,CMIP,DAMIP,FAFMIP,GMMIP,GeoMIP,HighResMIP,LS3MIP,LUMIP,PMIP,RFMIP,ScenarioMIP,VolMIP
1	N2O volume mixing ratio	mol mol-1			n2o	mole_fraction_of_nitrous_oxide_in_air	area: mean time: mean within years time: mean over years		real	longitude latitude plev19 time2	n2oClim	atmos atmosChem	monClim	area: areacella	Amon ((isd.003))	Amon_oth	80	a92e4ec6-817c-11e6-a4e2-5404a60d96b5	942125e5a461fef57b1477b9a2bd5fa0	e9f98ed8-c1ce-11e6-8067-ac72891c3257	Climatological mean, Global field (19 pressure levels) [XY-P19] [aclim]					AerChemMIP,C4MIP,CFMIP,CMIP,DAMIP,FAFMIP,GMMIP,GeoMIP,HighResMIP,LS3MIP,LUMIP,PMIP,RFMIP,VolMIP	C4MIP,CFMIP,CMIP,DAMIP,FAFMIP,GMMIP,GeoMIP,HighResMIP,LS3MIP,LUMIP,PMIP,RFMIP,ScenarioMIP,VolMIP
1	Global Mean Mole Fraction of N2O	1e-09	Global mean Nitrous Oxide (N2O)		n2oglobal	mole_fraction_of_nitrous_oxide_in_air	area: time: mean		real	time	n2oglobal	atmos atmosChem	mon		Amon ((isd.003))	Amon_oth	81	bab221e4-e5dd-11e5-8482-ac72891c3257	09c328529f2fac58c1b016da33ba394c	e9fb0b1e-c1ce-11e6-8067-ac72891c3257	Temporal mean, Global mean/constant [na-na]					AerChemMIP,C4MIP,CFMIP,CMIP,DAMIP,FAFMIP,GMMIP,GeoMIP,HighResMIP,LS3MIP,LUMIP,PMIP,RFMIP,VolMIP	C4MIP,CFMIP,CMIP,DAMIP,FAFMIP,GMMIP,GeoMIP,HighResMIP,LS3MIP,LUMIP,PMIP,RFMIP,ScenarioMIP,VolMIP
1	Global Mean Mole Fraction of N2O	1e-09	Global mean Nitrous Oxide (N2O)		n2oglobal	mole_fraction_of_nitrous_oxide_in_air	area: mean time: mean within years time: mean over years		real	time2	n2oglobalClim	atmos atmosChem	monClim		Amon ((isd.003))	Amon_oth	82	a92e6316-817c-11e6-a4e2-5404a60d96b5	09c328529f2fac58c1b016da33ba394c	e9f96386-c1ce-11e6-8067-ac72891c3257	Climatological mean, Global mean/constant [na-na] [aclim]					AerChemMIP,C4MIP,CFMIP,CMIP,DAMIP,FAFMIP,GMMIP,GeoMIP,HighResMIP,LS3MIP,LUMIP,PMIP,RFMIP,VolMIP	C4MIP,CFMIP,CMIP,DAMIP,FAFMIP,GMMIP,GeoMIP,HighResMIP,LS3MIP,LUMIP,PMIP,RFMIP,ScenarioMIP,VolMIP

## Sheet: CFday
Priority	Long name	units	description	comment	Variable Name	CF Standard Name	cell_methods	positive	type	dimensions	CMOR Name	modeling_realm	frequency	cell_measures	prov	provNote	rowIndex	UID	vid	stid	Structure Title	valid_min	valid_max	ok_min_mean_abs	ok_max_mean_abs	MIPs (requesting)	MIPs (by experiment)
1	omega (=dp/dt)	Pa s-1	Omega (vertical velocity in pressure coordinates, positive downwards) at 500 hPa level;	at 500 hPa level; commonly referred to as "omega", this represents the vertical component of velocity in pressure coordinates (positive down)	wap500	lagrangian_tendency_of_air_pressure	area: time: mean		real	longitude latitude time p500	wap500	atmos	day	area: areacella	CFday ((isd.003))	CFday_2d	26	babd06a4-e5dd-11e5-8482-ac72891c3257	e0a1b4528bdd009ada638396c9537baf	f7e53744-562c-11e6-a2a4-ac72891c3257	Temporal mean, Global field (single level) [XY-na] {:p500} [tmean]					CFMIP,HighResMIP,PMIP	CFMIP,CMIP,HighResMIP,PMIP

## Sheet: CFmon
Priority	Long name	units	description	comment	Variable Name	CF Standard Name	cell_methods	positive	type	dimensions	CMOR Name	modeling_realm	frequency	cell_measures	prov	provNote	rowIndex	UID	vid	stid	Structure Title	valid_min	valid_max	ok_min_mean_abs	ok_max_mean_abs	MIPs (requesting)	MIPs (by experiment)
1	Upwelling Longwave Radiation	W m-2	Upwelling longwave radiation (includes the fluxes at the surface and TOA)	Includes also the fluxes at the surface and TOA.	rlu	upwelling_longwave_flux_in_air	area: time: mean	up	real	longitude latitude alevhalf time	rlu	atmos	mon	area: areacella	CFmon ((isd.003))	CFmon_3dstd	15	bab56d68-e5dd-11e5-8482-ac72891c3257	bcfeacf77d49ef51a6ee66a1ab0ebcb4	f7e87814-562c-11e6-a2a4-ac72891c3257	Temporal mean, Global field on model atmosphere half-levels [XY-AH] [tmean]					AerChemMIP,CFMIP,DAMIP,GeoMIP,HighResMIP,PMIP	CFMIP,CMIP,DAMIP,GeoMIP,HighResMIP,PMIP,ScenarioMIP
1	Upwelling Shortwave Radiation	W m-2	Upwelling shortwave radiation (includes also the fluxes at the surface and top of atmosphere)	Includes also the fluxes at the surface and TOA.	rsu	upwelling_shortwave_flux_in_air	area: time: mean	up	real	longitude latitude alevhalf time	rsu	atmos	mon	area: areacella	CFmon ((isd.003))	CFmon_3dstd	16	bab64814-e5dd-11e5-8482-ac72891c3257	c323f38340e4846931ad4891232d839d	f7e87814-562c-11e6-a2a4-ac72891c3257	Temporal mean, Global field on model atmosphere half-levels [XY-AH] [tmean]					AerChemMIP,CFMIP,DAMIP,GeoMIP,HighResMIP,PMIP	CFMIP,CMIP,DAMIP,GeoMIP,HighResMIP,PMIP,ScenarioMIP
1	Downwelling Longwave Radiation	W m-2	Downwelling Longwave Radiation (includes the fluxes at the surface and TOA)	Includes also the fluxes at the surface and TOA.	rld	downwelling_longwave_flux_in_air	area: time: mean	down	real	longitude latitude alevhalf time	rld	atmos	mon	area: areacella	CFmon ((isd.003))	CFmon_3dstd	17	bab51cf0-e5dd-11e5-8482-ac72891c3257	c432bfbfc0e7f4403f91af39736ff61c	f7e87814-562c-11e6-a2a4-ac72891c3257	Temporal mean, Global field on model atmosphere half-levels [XY-AH] [tmean]					AerChemMIP,CFMIP,DAMIP,GeoMIP,HighResMIP,PMIP	CFMIP,CMIP,DAMIP,GeoMIP,HighResMIP,PMIP,ScenarioMIP
1	Downwelling Shortwave Radiation	W m-2	Downwelling shortwave radiation (includes the fluxes at the surface and top-of-atmosphere)	Includes also the fluxes at the surface and TOA.	rsd	downwelling_shortwave_flux_in_air	area: time: mean	down	real	longitude latitude alevhalf time	rsd	atmos	mon	area: areacella	CFmon ((isd.003))	CFmon_3dstd	18	bab5d424-e5dd-11e5-8482-ac72891c3257	eb9ac643cd9c73cae960d6d2db7b901d	f7e87814-562c-11e6-a2a4-ac72891c3257	Temporal mean, Global field on model atmosphere half-levels [XY-AH] [tmean]					AerChemMIP,CFMIP,DAMIP,GeoMIP,HighResMIP,PMIP	CFMIP,CMIP,DAMIP,GeoMIP,HighResMIP,PMIP,ScenarioMIP
1	Upwelling Clear-Sky Longwave Radiation	W m-2	Upwelling clear-sky longwave radiation (includes the fluxes at the surface and TOA)	Includes also the fluxes at the surface and TOA.	rlucs	upwelling_longwave_flux_in_air_assuming_clear_sky	area: time: mean	up	real	longitude latitude alevhalf time	rlucs	atmos	mon	area: areacella	CFmon ((isd.003))	CFmon_3dstd	19	bab5768c-e5dd-11e5-8482-ac72891c3257	a8607fe15cb4f2997228523340233d91	f7e87814-562c-11e6-a2a4-ac72891c3257	Temporal mean, Global field on model atmosphere half-levels [XY-AH] [tmean]					AerChemMIP,CFMIP,DAMIP,GeoMIP,HighResMIP,PMIP	CFMIP,CMIP,DAMIP,GeoMIP,HighResMIP,PMIP,ScenarioMIP
1	Upwelling Clear-Sky Shortwave Radiation	W m-2	Upwelling clear-sky shortwave radiation (includes the fluxes at the surface and TOA)	Includes also the fluxes at the surface and TOA.	rsucs	upwelling_shortwave_flux_in_air_assuming_clear_sky	area: time: mean	up	real	longitude latitude alevhalf time	rsucs	atmos	mon	area: areacella	CFmon ((isd.003))	CFmon_3dstd	20	bab64ee0-e5dd-11e5-8482-ac72891c3257	eb72b66b6365daed79aefeda9d3d30b5	f7e87814-562c-11e6-a2a4-ac72891c3257	Temporal mean, Global field on model atmosphere half-levels [XY-AH] [tmean]					AerChemMIP,CFMIP,DAMIP,GeoMIP,HighResMIP,PMIP	CFMIP,CMIP,DAMIP,GeoMIP,HighResMIP,PMIP,ScenarioMIP
1	Downwelling Clear-Sky Longwave Radiation	W m-2	Downwelling clear-sky longwave radiation (includes the fluxes at the surface and TOA)	Includes also the fluxes at the surface and TOA.	rldcs	downwelling_longwave_flux_in_air_assuming_clear_sky	area: time: mean	down	real	longitude latitude alevhalf time	rldcs	atmos	mon	area: areacella	CFmon ((isd.003))	CFmon_3dstd	21	bab5268c-e5dd-11e5-8482-ac72891c3257	e79eb59d74038643b2201bb0556e720a	f7e87814-562c-11e6-a2a4-ac72891c3257	Temporal mean, Global field on model atmosphere half-levels [XY-AH] [tmean]					AerChemMIP,CFMIP,DAMIP,GeoMIP,HighResMIP,PMIP	CFMIP,CMIP,DAMIP,GeoMIP,HighResMIP,PMIP,ScenarioMIP
1	Downwelling Clear-Sky Shortwave Radiation	W m-2	Downwelling clear-sky shortwave radiation (includes the fluxes at the surface and top-of-atmosphere)	Includes also the fluxes at the surface and TOA.	rsdcs	downwelling_shortwave_flux_in_air_assuming_clear_sky	area: time: mean	down	real	longitude latitude alevhalf time	rsdcs	atmos	mon	area: areacella	CFmon ((isd.003))	CFmon_3dstd	22	bab5d898-e5dd-11e5-8482-ac72891c3257	38806cec3ba894d7745fada80c9f6fe6	f7e87814-562c-11e6-a2a4-ac72891c3257	Temporal mean, Global field on model atmosphere half-levels [XY-AH] [tmean]					AerChemMIP,CFMIP,DAMIP,GeoMIP,HighResMIP,PMIP	CFMIP,CMIP,DAMIP,GeoMIP,HighResMIP,PMIP,ScenarioMIP
1	Tendency of Air Temperature	K s-1	Tendency of Air Temperature		tnt	tendency_of_air_temperature	area: time: mean		real	longitude latitude alevel time	tnt	atmos	mon	area: areacella	CFmon ((isd.003))	CFmon_3dstd	24	baba4b30-e5dd-11e5-8482-ac72891c3257	c8b1814845661bcad37910e70a59b285	62eebe98-1617-11e7-a126-5404a60d96b5	Temporal mean, Global field on model atmosphere levels [XY-A]					AerChemMIP,CFMIP,DAMIP,GeoMIP,HighResMIP,PMIP	CFMIP,CMIP,DAMIP,GeoMIP,HighResMIP,PMIP,ScenarioMIP
1	Tendency of Air Temperature due to Advection	K s-1	Tendency of Air Temperature due to Advection		tnta	tendency_of_air_temperature_due_to_advection	area: time: mean		real	longitude latitude alevel time	tnta	atmos	mon	area: areacella	CFmon ((isd.003))	CFmon_3dstd	25	baba4f22-e5dd-11e5-8482-ac72891c3257	ea55d8afe6bacbfa1029c0048717eaaa	62eebe98-1617-11e7-a126-5404a60d96b5	Temporal mean, Global field on model atmosphere levels [XY-A]					AerChemMIP,CFMIP,DAMIP,GeoMIP,HighResMIP,PMIP	CFMIP,CMIP,DAMIP,GeoMIP,HighResMIP,PMIP,ScenarioMIP
1	Tendency of Air Temperature due to Model Physics	K s-1	Tendency of air temperature due to model physics. This includes sources and sinks from parametrized physics (e.g. radiation, convection, boundary layer, stratiform condensation/evaporation, etc.). It excludes sources and sinks from resolved dynamics and numerical diffusion not associated with parametrized physics. For example, any vertical diffusion which is part of the boundary layer mixing sche…	This includes sources and sinks from parametrized physics (e.g. radiation, convection, boundary layer, stratiform condensation/evaporation, etc.). It excludes sources and sinks from resolved dynamics and numerical diffusion not associated with parametrized physics. For example, any vertical diffusion which is part of the boundary layer mixing scheme should be included, while numerical diffusion a…	tntmp	tendency_of_air_temperature_due_to_model_physics	area: time: mean		real	longitude latitude alevel time	tntmp	atmos	mon	area: areacella	CFmon ((isd.003))	CFmon_3dstd	26	baba5d78-e5dd-11e5-8482-ac72891c3257	621681bc7c376de66228fdde13b97516	62eebe98-1617-11e7-a126-5404a60d96b5	Temporal mean, Global field on model atmosphere levels [XY-A]					AerChemMIP,CFMIP,DAMIP,GeoMIP,HighResMIP,PMIP	CFMIP,CMIP,DAMIP,GeoMIP,HighResMIP,PMIP,ScenarioMIP
1	Tendency of Air Temperature Due to Stratiform Cloud and Precipitation and Boundary Layer Mixing	K s-1	Tendency of Air Temperature Due to Stratiform Cloud and Precipitation and Boundary Layer Mixing (to be specified only in models which do not separate cloud, precipitation and boundary layer terms. Includes all boundary layer terms including diffusive ones.)	To be specified only in models which do not separate cloud, precipitation and boundary layer terms. Includes all boundary layer terms including diffusive ones.	tntscpbl	tendency_of_air_temperature_due_to_stratiform_cloud_and_precipitation_and_boundary_layer_mixing	area: time: mean		real	longitude latitude alevel time	tntscpbl	atmos	mon	area: areacella	CFmon ((isd.003))	CFmon_3dstd	27	baba657a-e5dd-11e5-8482-ac72891c3257	475dc209e9f9cd51eedee4d26caf9f67	62eebe98-1617-11e7-a126-5404a60d96b5	Temporal mean, Global field on model atmosphere levels [XY-A]					AerChemMIP,CFMIP,DAMIP,GeoMIP,HighResMIP,PMIP	CFMIP,CMIP,DAMIP,GeoMIP,HighResMIP,PMIP,ScenarioMIP
1	Tendency of Air Temperature due to Radiative Heating	K s-1	Tendency of Air Temperature due to Radiative Heating		tntr	tendency_of_air_temperature_due_to_radiative_heating	area: time: mean		real	longitude latitude alevel time	tntr	atmos	mon	area: areacella	CFmon ((isd.003))	CFmon_3dstd	28	baba617e-e5dd-11e5-8482-ac72891c3257	93a0ba1f23bfc41b720ea68951d28144	62eebe98-1617-11e7-a126-5404a60d96b5	Temporal mean, Global field on model atmosphere levels [XY-A]					AerChemMIP,CFMIP,DAMIP,GeoMIP,HighResMIP,PMIP	CFMIP,CMIP,DAMIP,GeoMIP,HighResMIP,PMIP,ScenarioMIP
1	Tendency of Air Temperature due to Convection	K s-1	Tendencies from cumulus convection scheme.	Tendencies from cumulus convection scheme.	tntc	tendency_of_air_temperature_due_to_convection	area: time: mean		real	longitude latitude alevel time	tntc	atmos	mon	area: areacella	CFmon ((isd.003))	CFmon_3dstd	29	baba5300-e5dd-11e5-8482-ac72891c3257	52f043533a691ca5721460e316c3a328	62eebe98-1617-11e7-a126-5404a60d96b5	Temporal mean, Global field on model atmosphere levels [XY-A]					AerChemMIP,CFMIP,DAMIP,GeoMIP,HighResMIP,PMIP	CFMIP,CMIP,DAMIP,GeoMIP,HighResMIP,PMIP,ScenarioMIP
1	Tendency of Specific Humidity	s-1	Tendency of Specific Humidity		tnhus	tendency_of_specific_humidity	area: time: mean		real	longitude latitude alevel time	tnhus	atmos	mon	area: areacella	CFmon ((isd.003))	CFmon_3dstd	32	bab9ca3e-e5dd-11e5-8482-ac72891c3257	2a6093caf9e5cd42fb2fba6bdb73d6db	62eebe98-1617-11e7-a126-5404a60d96b5	Temporal mean, Global field on model atmosphere levels [XY-A]					AerChemMIP,CFMIP,DAMIP,GeoMIP,HighResMIP,PMIP	CFMIP,CMIP,DAMIP,GeoMIP,HighResMIP,PMIP,ScenarioMIP
1	Tendency of Specific Humidity due to Advection	s-1	Tendency of Specific Humidity due to Advection		tnhusa	tendency_of_specific_humidity_due_to_advection	area: time: mean		real	longitude latitude alevel time	tnhusa	atmos	mon	area: areacella	CFmon ((isd.003))	CFmon_3dstd	33	bab9ce44-e5dd-11e5-8482-ac72891c3257	150d0829eec06aeaf75d22d08d328ffa	62eebe98-1617-11e7-a126-5404a60d96b5	Temporal mean, Global field on model atmosphere levels [XY-A]					AerChemMIP,CFMIP,DAMIP,GeoMIP,HighResMIP,PMIP	CFMIP,CMIP,DAMIP,GeoMIP,HighResMIP,PMIP,ScenarioMIP
1	Tendency of Specific Humidity due to Convection	s-1	Tendencies from cumulus convection scheme.	Tendencies from cumulus convection scheme.	tnhusc	tendency_of_specific_humidity_due_to_convection	area: time: mean		real	longitude latitude alevel time	tnhusc	atmos	mon	area: areacella	CFmon ((isd.003))	CFmon_3dstd	34	bab9d236-e5dd-11e5-8482-ac72891c3257	a1d576b3fc447c37d782926441428ffd	62eebe98-1617-11e7-a126-5404a60d96b5	Temporal mean, Global field on model atmosphere levels [XY-A]					AerChemMIP,CFMIP,DAMIP,GeoMIP,HighResMIP,PMIP	CFMIP,CMIP,DAMIP,GeoMIP,HighResMIP,PMIP,ScenarioMIP
1	Tendency of Specific Humidity due to Numerical Diffusion	s-1	Tendency of specific humidity due to numerical diffusion.This includes any horizontal or vertical numerical moisture diffusion not associated with the parametrized moist physics or the resolved dynamics. For example, any vertical diffusion which is part of the boundary layer mixing scheme should be excluded, as should any diffusion which is included in the terms from the resolved dynamics. This t…	This includes any horizontal or vertical numerical moisture diffusion not associated with the parametrized moist physics or the resolved dynamics. For example, any vertical diffusion which is part of the boundary layer mixing scheme should be excluded, as should any diffusion which is included in the terms from the resolved dynamics. This term is required to check the closure of the moisture budg…	tnhusd	tendency_of_specific_humidity_due_to_diffusion	area: time: mean		real	longitude latitude alevel time	tnhusd	atmos	mon	area: areacella	CFmon ((isd.003))	CFmon_3dstd	35	bab9d6c8-e5dd-11e5-8482-ac72891c3257	2c8cb564bae033f641135194947da163	62eebe98-1617-11e7-a126-5404a60d96b5	Temporal mean, Global field on model atmosphere levels [XY-A]					AerChemMIP,CFMIP,DAMIP,GeoMIP,HighResMIP,PMIP	CFMIP,CMIP,DAMIP,GeoMIP,HighResMIP,PMIP,ScenarioMIP
1	Tendency of Specific Humidity Due to Stratiform Cloud and Precipitation and Boundary Layer Mixing	s-1	Tendency of Specific Humidity Due to Stratiform Cloud and Precipitation and Boundary Layer Mixing (to be specified only in models which do not separate budget terms for stratiform cloud, precipitation and boundary layer schemes. Includes all boundary layer terms including and diffusive terms.)	To be specified only in models which do not separate budget terms for stratiform cloud, precipitation and boundary layer schemes. Includes all bounday layer terms including and diffusive terms.	tnhusscpbl	tendency_of_specific_humidity_due_to_stratiform_cloud_and_precipitation_and_boundary_layer_mixing	area: time: mean		real	longitude latitude alevel time	tnhusscpbl	atmos	mon	area: areacella	CFmon ((isd.003))	CFmon_3dstd	36	bab9dfd8-e5dd-11e5-8482-ac72891c3257	9e9e7476986ece18ce380652eaabe342	62eebe98-1617-11e7-a126-5404a60d96b5	Temporal mean, Global field on model atmosphere levels [XY-A]					AerChemMIP,CFMIP,DAMIP,GeoMIP,HighResMIP,PMIP	CFMIP,CMIP,DAMIP,GeoMIP,HighResMIP,PMIP,ScenarioMIP
1	Tendency of Specific Humidity due to Model Physics	s-1	Tendency of specific humidity due to model physics. This includes sources and sinks from parametrized moist physics (e.g. convection, boundary layer, stratiform condensation/evaporation, etc.) and excludes sources and sinks from resolved dynamics or from horizontal or vertical numerical diffusion not associated with model physics. For example any diffusive mixing by the boundary layer scheme woul…	This includes sources and sinks from parametrized moist physics (e.g. convection, boundary layer, stratiform condensation/evaporation, etc.) and excludes sources and sinks from resolved dynamics or from horizontal or vertical numerical diffusion not associated with model physicsl. For example any diffusive mixing by the boundary layer scheme would be included.	tnhusmp	tendency_of_specific_humidity_due_to_model_physics	area: time: mean		real	longitude latitude alevel time	tnhusmp	atmos	mon	area: areacella	CFmon ((isd.003))	CFmon_3dstd	37	bab9db28-e5dd-11e5-8482-ac72891c3257	6e30ba1e2c19dcbd85faa176d4eae596	62eebe98-1617-11e7-a126-5404a60d96b5	Temporal mean, Global field on model atmosphere levels [XY-A]					AerChemMIP,CFMIP,DAMIP,GeoMIP,HighResMIP,PMIP	CFMIP,CMIP,DAMIP,GeoMIP,HighResMIP,PMIP,ScenarioMIP
2	Convective Cloud Area Fraction	%	Include only convective cloud.		clc	convective_cloud_area_fraction_in_atmosphere_layer	area: time: mean		real	longitude latitude alevel time	clc	atmos	mon	area: areacella	CFmon ((isd.003))	CFmon_3dstd	40	baaa557c-e5dd-11e5-8482-ac72891c3257	1aefc13bd27020244fe1cfd706ce1041	62eebe98-1617-11e7-a126-5404a60d96b5	Temporal mean, Global field on model atmosphere levels [XY-A]					AerChemMIP,CFMIP,DAMIP,GeoMIP,HighResMIP,PMIP	CFMIP,CMIP,DAMIP,GeoMIP,HighResMIP,PMIP,ScenarioMIP
2	Percentage Cover of Stratiform Cloud	%	unset		cls	stratiform_cloud_area_fraction_in_atmosphere_layer	area: time: mean		real	longitude latitude alevel time	cls	atmos	mon	area: areacella	CFmon ((isd.003))	CFmon_3dstd	43	baaac764-e5dd-11e5-8482-ac72891c3257	2cd1940e7201d5adb02ba157a74fc33e	62eebe98-1617-11e7-a126-5404a60d96b5	Temporal mean, Global field on model atmosphere levels [XY-A]					AerChemMIP,CFMIP,GeoMIP,HighResMIP,PMIP	CFMIP,CMIP,GeoMIP,HighResMIP,PMIP,ScenarioMIP
1	ISCCP Total Cloud Cover Percentage	%	Percentage total cloud cover, simulating ISCCP observations.		cltisccp	cloud_area_fraction	area: time: mean		real	longitude latitude time	cltisccp	atmos	mon	area: areacella	CFmon ((isd.003))	CFmon_sim	62	baaafa68-e5dd-11e5-8482-ac72891c3257	b045cae1f65ba99831648f136b309e91	f7dcac96-562c-11e6-a2a4-ac72891c3257	Temporal mean, Global field (single level) [XY-na] [am-tm]					AerChemMIP,CFMIP,DAMIP,HighResMIP,PMIP,RFMIP	CFMIP,CMIP,DAMIP,HighResMIP,PMIP,RFMIP,ScenarioMIP
1	ISCCP Cloud Area Fraction	%	Percentage cloud cover in optical depth categories.		clisccp	cloud_area_fraction_in_atmosphere_layer	area: time: mean		real	longitude latitude plev7c tau time	clisccp	atmos	mon	area: areacella	CFmon ((isd.003))	CFmon_sim	65	2ab325ee-c07e-11e6-8775-5404a60d96b5	fa7666d61b92de5bad1ad76561b8b850	f7e8acd0-562c-11e6-a2a4-ac72891c3257	Temporal mean, Global field (7 pressure levels) [XY-P7] {tau:} [tmean]					AerChemMIP,CFMIP,DAMIP,HighResMIP,PMIP,RFMIP	CFMIP,CMIP,DAMIP,HighResMIP,PMIP,RFMIP,ScenarioMIP

## Sheet: Eday
Priority	Long name	units	description	comment	Variable Name	CF Standard Name	cell_methods	positive	type	dimensions	CMOR Name	modeling_realm	frequency	cell_measures	prov	provNote	rowIndex	UID	vid	stid	Structure Title	valid_min	valid_max	ok_min_mean_abs	ok_max_mean_abs	MIPs (requesting)	MIPs (by experiment)
1	Air Temperature	K	Air temperature at 850hPa		ta850	air_temperature	area: time: mean			longitude latitude time p850	ta850	atmos	day	area: areacella	DCPP [DCPP-day]		18	8b91f2e4-4a5b-11e6-9cd2-ac72891c3257	1e73cc52b4b323161e26ffd19ad68af4	f7ea7254-562c-11e6-a2a4-ac72891c3257	Temporal mean, Global field (single level) [XY-na] {:p850} [tmean]					DCPP,PMIP	C4MIP,CMIP,DCPP,PMIP,ScenarioMIP
1	Maximum Hourly Precipitation Rate	kg m-2 s-1		Daily Maximum Hourly Precipitation Rate	prhmax	precipitation_flux	area: mean time: mean within hours time: maximum over hours			longitude latitude time	prhmax	atmos	day	area: areacella	PMIP [PMIP-day-02]		4	d237723e-4a9f-11e6-b84e-ac72891c3257	7553003ead183dd3276108b6311a337f	b639160c-c69e-11e6-9990-ac72891c3257	Hourly Maximum, Global field (single level) [XY-na] [tmean]					DCPP,PMIP	C4MIP,CMIP,DCPP,PMIP,ScenarioMIP
1	Height of Boundary Layer	m		Height of Boundary Layer	zmla	atmosphere_boundary_layer_thickness	area: time: mean			longitude latitude time	zmla	atmos	day	area: areacella	PMIP [PMIP-day-02]		6	6f6c3c4e-9acb-11e6-b7ee-ac72891c3257	93e06dd7c756aade75235d7841c05269	f7dcac96-562c-11e6-a2a4-ac72891c3257	Temporal mean, Global field (single level) [XY-na] [am-tm]					PMIP	C4MIP,CMIP,PMIP,ScenarioMIP
1	Specific Humidity	1.0	unset	Specific Humidity	hus850	specific_humidity	area: time: mean			longitude latitude time p850	hus850	atmos	day	area: areacella	PMIP [PMIP-day-02]		7	6f6c4072-9acb-11e6-b7ee-ac72891c3257	af0e7f4ba96314bef40cc98e5dd078af	f7ea7254-562c-11e6-a2a4-ac72891c3257	Temporal mean, Global field (single level) [XY-na] {:p850} [tmean]					PMIP	C4MIP,CMIP,PMIP,ScenarioMIP
1	Air Temperature	K	Temperature on the 500 hPa surface		ta500	air_temperature	area: time: mean			longitude latitude time p500	ta500	atmos	day	area: areacella	PMIP [PMIP-day-02]		8	6f6c4482-9acb-11e6-b7ee-ac72891c3257	f6928c80a369489688a5da8e78a7a3b7	f7e53744-562c-11e6-a2a4-ac72891c3257	Temporal mean, Global field (single level) [XY-na] {:p500} [tmean]					PMIP	C4MIP,CMIP,PMIP,ScenarioMIP
1	Eastward Wind at 200hPa	m s-1	Zonal wind (positive eastwards) at 200hPa		ua200	eastward_wind	area: time: mean			longitude latitude time p200	ua200	atmos	day	area: areacella	PMIP [PMIP-day-02]		10	6f6c4ca2-9acb-11e6-b7ee-ac72891c3257	df11ad28e457894085d760bdfb1cfc96	f7ed42fe-562c-11e6-a2a4-ac72891c3257	Temporal mean, Global field (single level) [XY-na] {:p200}					PMIP	C4MIP,CMIP,PMIP,ScenarioMIP
1	Eastward Wind at 850 hPa	m s-1	Zonal wind on the 850 hPa surface		ua850	eastward_wind	area: time: mean			longitude latitude time p850	ua850	atmos	day	area: areacella	PMIP [PMIP-day-02]		11	6f6c50a8-9acb-11e6-b7ee-ac72891c3257	74664cc3f23008726cc939f53e57325a	f7ea7254-562c-11e6-a2a4-ac72891c3257	Temporal mean, Global field (single level) [XY-na] {:p850} [tmean]					PMIP	C4MIP,CMIP,PMIP,ScenarioMIP
1	Northward Wind	m s-1	Northward component of the wind		va200	northward_wind	area: time: mean			longitude latitude time p200	va200	atmos	day	area: areacella	PMIP [PMIP-day-02]		12	6f6c54fe-9acb-11e6-b7ee-ac72891c3257	31da97523029203798a150a71bc20301	f7ed42fe-562c-11e6-a2a4-ac72891c3257	Temporal mean, Global field (single level) [XY-na] {:p200}					PMIP	C4MIP,CMIP,PMIP,ScenarioMIP
1	Northward Wind	m s-1	Northward component of the wind at 850hPa		va850	northward_wind	area: time: mean			longitude latitude time p850	va850	atmos	day	area: areacella	PMIP [PMIP-day-02]		13	6f6c58fa-9acb-11e6-b7ee-ac72891c3257	4845c81a8e19c6dd7059fa1a115c17ab	f7ea7254-562c-11e6-a2a4-ac72891c3257	Temporal mean, Global field (single level) [XY-na] {:p850} [tmean]					PMIP	C4MIP,CMIP,PMIP,ScenarioMIP

## Sheet: Efx
Priority	Long name	units	description	comment	Variable Name	CF Standard Name	cell_methods	positive	type	dimensions	CMOR Name	modeling_realm	frequency	cell_measures	prov	provNote	rowIndex	UID	vid	stid	Structure Title	valid_min	valid_max	ok_min_mean_abs	ok_max_mean_abs	MIPs (requesting)	MIPs (by experiment)
2	Vegetation height averaged over all vegetation types and over the vegetated fraction of a grid cell.	m		Canopy height	vegHeight	canopy_height	area: mean where land		float	longitude latitude	vegHeight	land	fx	area: areacella	CMIP [fx]		5	90fa4aa8-267c-11e7-8933-ac72891c3257	59170cbe-9e49-11e5-803c-0d0b866b59f3	63c32b44-15f2-11e7-87e0-5404a60d96b5	No temporal dimensions ... fixed field, Global field (single level) [XY-na] [amla]					CMIP,DCPP,PMIP	CMIP,DCPP,PMIP

[truncated: 10 more sheets: Emon, EmonZ, LImon, Lmon, Ofx, Omon, Oyr, SImon, day, fx]
