# Supplementary figures and images for: The PMIP4 contribution to CMIP6 – Part 4: Scientific objectives and experimental design of the PMIP4-CMIP6 Last Glacial Maximum experiments and PMIP4 sensitivity experiments
Source: Copernicus journal article supplement (doi:10.5194/gmd-10-4035-2017), 2017-11-07

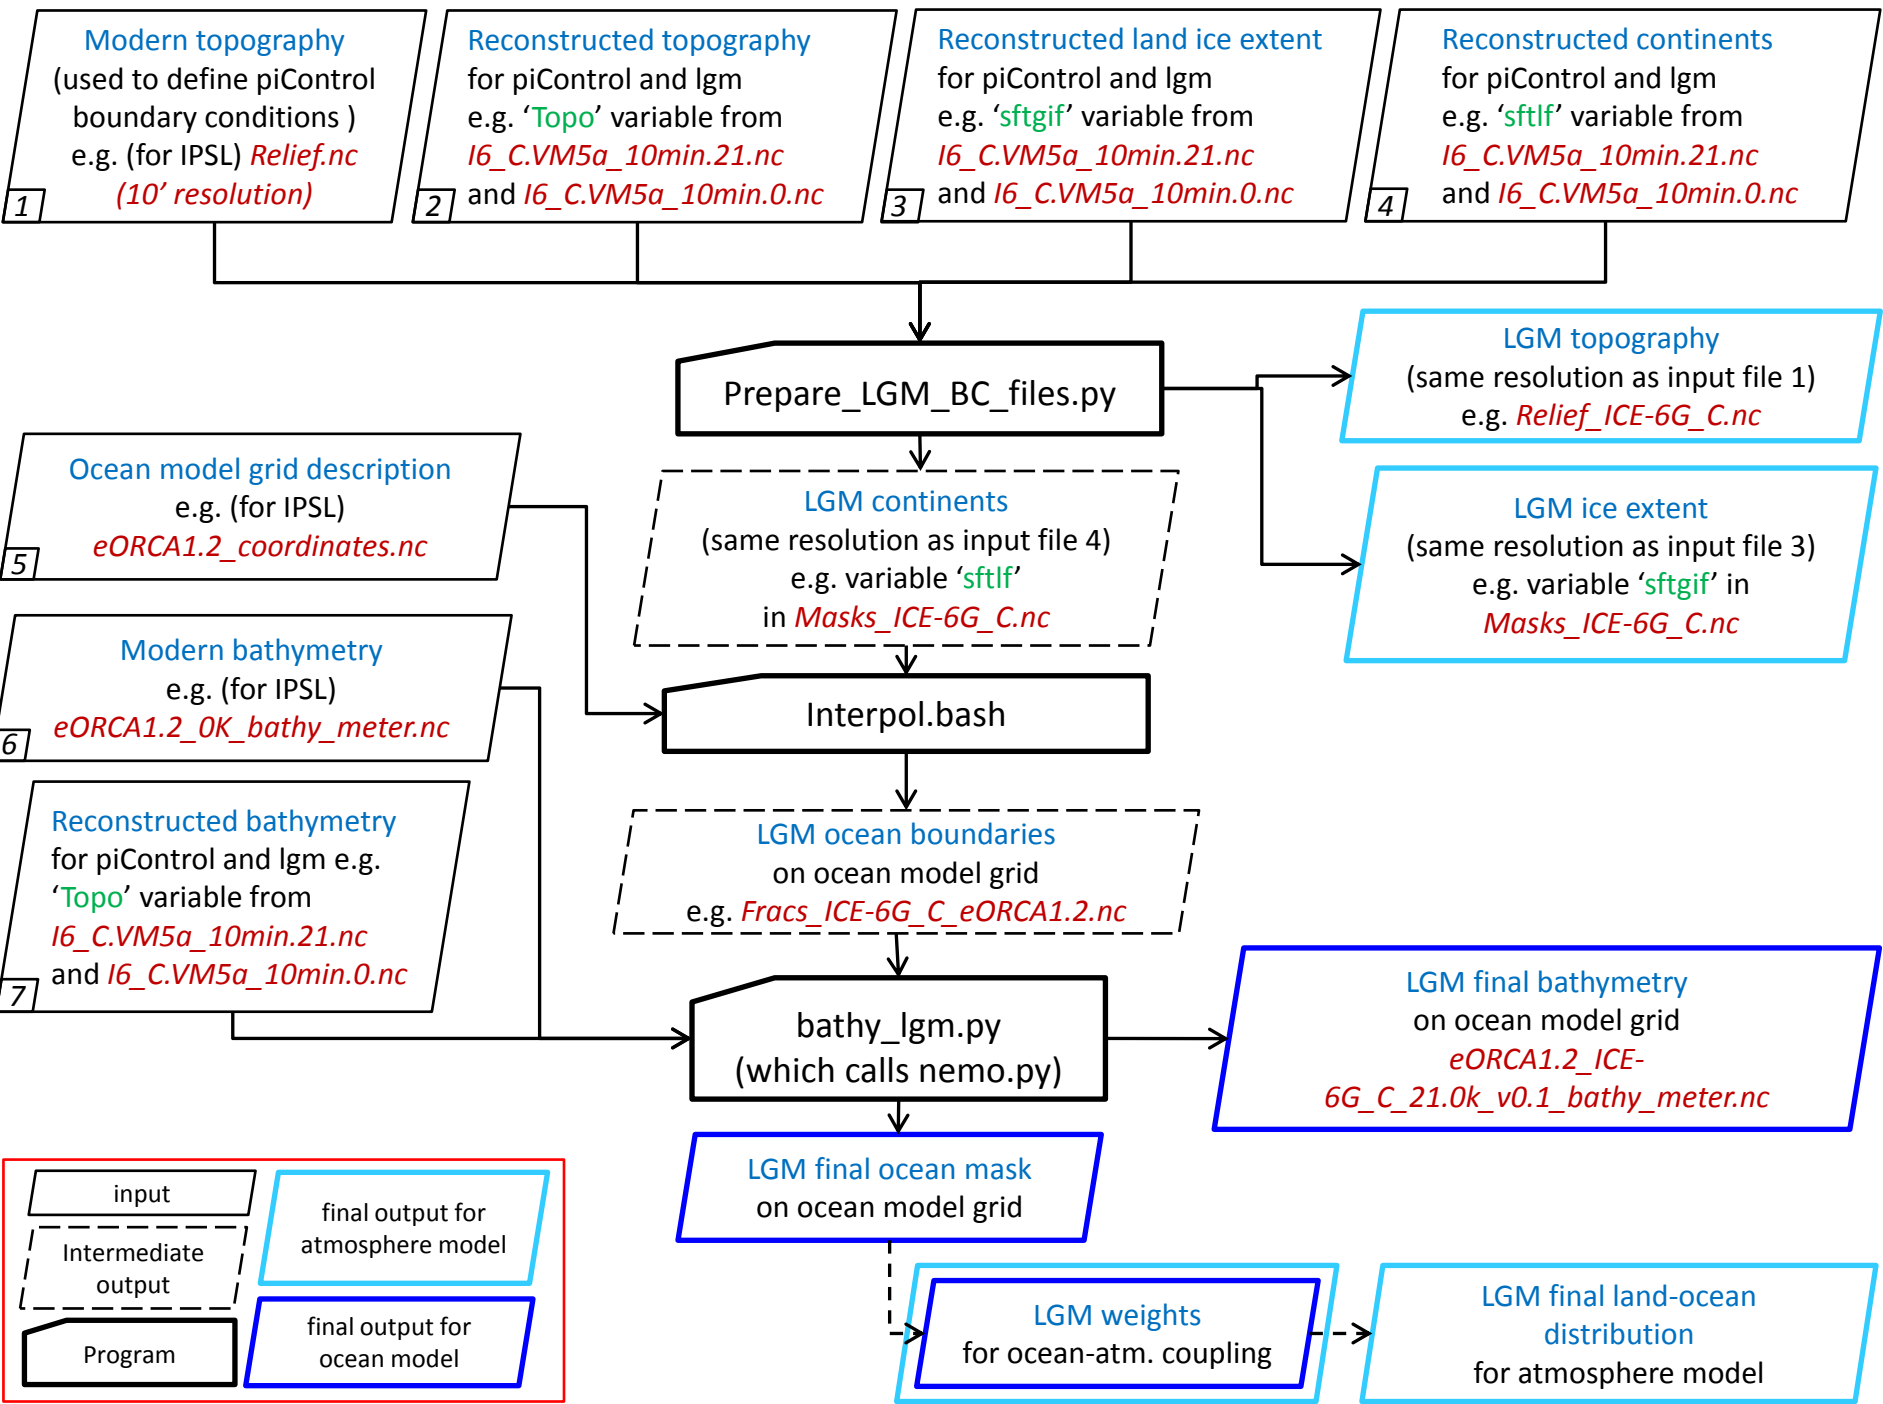

Supplement: Supplementary file 2 [file gmd-10-4035-2017-supplement.zip › FigureS1.pdf]
